# Supplementary material
Source: publisher figshare collection journal article supplement (https://gsajournals.figshare.com/ndownloader/files/17039399)
Supplement: Supplementary file 1 [file 17039399]

## Sheet: Sheet1
FILE S2. Summary of neuropeptide precursors in different molluscan species
Neuropeptides	Haliotis laevigata	Sequence	Theba pisana	Sequence	Aplysia californica	Sequence	Lottia gigantea	Sequence	Charonia tritonis	Sequence	Biomphalaria glabrata	Sequence	Crassostrea gigas	Sequence	Saccostrea glomerata	Sequence	Octopus bimaculoides	Sequence
Achatin	Hla-Achatin	IIACQRINDSAETILSLRFKSLTGRSLYSSEPSEKCKPLHTKTSEHSRAAVAMLPNWLFLCGVGLVCLGWVLAEDNEFSDNVHTYNEEDYDPDEEFDKRGFGDKRGFGDKRGFGDKRGFGDKRGFGDKRGFGDKRGFGDKRGFGDKRGFGDKRVPSELNSRLFSMIFRSLGYPEGRRLLGRRGLFL*	Achatin	MASVSHFLLLAFTLAAAFNLIALHELDYLEDAELDSDEEDFLGKRGFADKRGFADKRGFADKRGFADKRGFADKRGFADKRGFADKRERISPLVLRLLQRSYQNQALPLTGHNAFSRLLAREGLLE	Aca-Achatin	MTSSAQCLLLTMLLVATLDFLYAEDIGFAETDSELTPFAGAVADHVLKEGFGKRGYFDKRGFFDKRGDASKRGFFDKRGFFDKKSYADSKDEESNAALSDFAEDKRGFFGKRYYGSKREEISPRVLNLLLRNYQIHPSPLNGHNAFSRLLAKQGFWEN	Lgi-Achatin	MLPQNILIWLSVLVASVGITVFADELEFTDAIEAVDGPRLIVAEGNEILDKEDATKRLFGDKRLFGDKRIFLENPEHKRLFLDKRGFGDKRGYGDKRGYGDKRGFGDKRGFGDKRGFADKRGFGDKRSSASSLRPFLLAMLDNFGSRRPKNSYAYWSHRPGLLIRNGRSA	Ctr-Achatin	MTSYYRYLLTLAIVIAAVKLLLADDLDFNDDASFALGEDFEPFGDIDFGKRGFGNKRGFGDKRGFGDKRGFADKRGFGDKRGFADKRGFGDKRGRSYSPSNLMAALFRSYYHRQPLAGSIALKRLLEKQGIWQ*	Bgl-Achatin	MSTIASYFIMTFVLLGTLHCLAANEVEFLEAAELEPFEDKELLLSDLDRRGFADKRGFADKRGFADKRGFADKRGFADKRGFADKRGFADKRGYGDFREINPLLWKYMRHSQHQPLAIGQNSFKRLLAQQGILDN*	Cgi-Achatin	MAQWLEHQALEVLNMRTPLLILLISLAFTFGTAENHLLEQYENDEDIQHQLQNEAYYKRGFWDKRGFWDKRMSHKDFSHGSDDSSWNNLILLLKDYIRYKHESNKKEQVFSNGLQNSH	Sgl-Achatin	MWTYILFLFVCNCFVYGTKITHFLEKNENNVDLQNQQNVLSHYRVQNEVKYKRGFWDKRGFWDKRKSNKDIVFPNKEQMLDNLLETLKENLQNEMIRKMKKSIPEISYKIAERPGESDPTKRGFWDK*	Obi-Achatin	MVGHKNYSSLLFALFLTLSIQICRSYNSGSYNSRQLLSLHNHEEAKELNKDRLLTMEKALKSGIIGRSLTKRGFGDKRDGNIRPILLETRGFGDKRLAEISYEREGSPEIQGIELFARGFGDKRGLDDNQLLEKSIFSNPDYLELLDRSIDDKRGFGDKRGFGDKRGFGDKRFMVVGRGFGDKRGFGDKRGFGDKRGFGDKRGFGDKRGFGDKRGFGDK*
AKH	Hla-AKH	MPSVRSLALALTVVCLLGHTFGQISFSPNWGTGKRSSALGLDHECWGKSELRILYDVVKVIRRQAESLARCMQDTEAEEAMLKH*	AKH	MKSSCVFAALVLIIVSLTLSCHGQIHYTPDWGHGKRSLTSQFGDSGTDSTVPCMEQTELNLLLEVAKILTREAKRLSNCLKDCPSLE	Aca-AKH	MESSSILLILVVLVIGTSTCLAQIHFSPDWGTGKRAVSTVTEKEIPLCWQIADKEIIDIMLLIQRTAKKLSSCLNTCPEL*	Lgi-AKH	MSLSRNLSVLVCLCCLLSMCLAQIHFSPTWGSGKRSAPVQTYPDSSNTNCYDKLNTKILYQLVKIIKKESEELTACLLQDDDFLRR*	Ctr-AKH	MYPNHVMCLMALLCLLMVACPVTPQIHFSPTWGTGKRSSGHGHGSMGSPWSFPTYPESSSHD	Bgl-AKH	MQNARFVTLLTLMTIGWTLGQIHFTPDWGNNGKRSLTSQFEEESSYSSISCLEQTDLKFLLDIAKLLTKEAKRLSSCLKDCPTL*	Cgi-AKH	MLCKFCILAVVALSLLSLTLGQVSFSTNWGSGKRSSSSFIAPQADDACWTKSNAKLLYDLMQVIQKQVDRLVACQNSNDDLHRI	Sgl-AKH	MLCKFWIQLLVAVSLLTVSYGQVSFSTNWGSGKRSSDTAPLINDICLAKTDTKLLYDLMRVIQRQAERIIACSSNYDELKRV*	-	-
Allatostatin-C	Hla-Allatostatin-C	MTWQGTSSDTVLLKRSLRQAYEDQLAMLQEAEENLTQQIAALQHQRQEITQRKRSHYMCLVNLITCYRKRK*	-	-	Aca-Allatostatin-C	SPRTMEEASALQLLPGKIGRASLLREMERQLMILQAAEENIVSGLQELEEERRVLSGRKRSHYSSMCMFNVVACYRKRK*	Lgi-Allatostatin-C	VLTLTLFCICLNEVSSNKILPGEEHRQLVQITEESSNNDRLLKRSTLQDAYESHLAMLMEAEQSLTKQIEELKLRREELSNRKRSHVMCLVNLISCFRKR	Ctr-Allatostatin-C	MSSALAFITALTLLLMSSQTMSASSSSGQKPEASSLQGPQLQDLMSEDDARLLKRSLREELQQHFELLQEAEENILQKIEALRAQRQAISQRKRSHYMCLVNIVACYK*	Bgl-Allatostatin-C	-	Cgi-Allatostatin-C	MELTQSVFVLKLYAAVVAVLLVAEVHAQPQKFSTEIQQTGDESSTDLNLFKMALREAYNRELEFYEQQEAQIVKQLAALENDRNQIRERKRSHIRCLVNVIACYRKK	-	-	-	-
Allatotropin	Hla-Allatotropin	MVSGVCLDGSSHSHRFSTMMRTTLLMLGLLLVAVVASLPHNTHSRQKRGFRANSADRVAHGYGKRTYSSWENSFNTESKHLLSVEDLANLVANNPTLAEALIRKFVDVDDDGFVGNNELFERSNE*	Allatotropin	MSRPSVSAILGVAVICVCLCDLVVSDASSLRRQKRGFRGDAATRVAHGFGKRGFLHPASESSLQFSLGALDNSPASLEDVSDGVLMSVDDFAELLVNHRNLAKALLKKFVDIDGDGLVSTDELFRPVLKK	Aca-Allatotropin	MLSAPSIAHTGVALLVLMCLCPFSQSTEASLSRAKRGFRLNSASRVAHGYGKRGYASSSGAVPYPELARDVLDNLRAEEEEKELEWSIMSVDELASLLQSHPKLARALVKKFVDINGDNLVTAEELFRPPTRK	Lgi-Allatotropin	MKLTLVLVTVTLTITILANAYPQSPSLSHHRSKRGFKANSASRVAHGYGKRGFPSWKNYFQDGGSDVLSVEDEMAELVAENPSLAKALLRKFVDTDNDGIISTTELLGTKQMLK	Ctr-Allatotropin	MMRTSLVLLALLVIALGHALPTKNLSRQKRGFRVNSASRVAHGYGKRQFNTWDDNPLKSQSSSELMTVSELAQLAAENPSLTEALIEKFIDVDGDGIVSSQELFGLDAQ*	Bgl-Allatotropin	MCRSSLTFQVGVVLIAICLLDVVVSEDRRINRQKRGFRMNSASRVAHGYGKRGYQLPSSSSSGESQDQLESYTGLLEELSDGPLMTVNEFTQLMTGHPNLARALVKKFVDINGDDVISTEELFRPVMTK	Cgi-Allatotropin	MQMVKVVLVTVLLTLCVIVDCLPHSSTKMRQKRGFRQSIVDRMGHGFGKRANTDLYDPYLTKTPNLMTADELTTNILNSEDLAQAIVKKFIDLDGDGIISTAELLRTTS*	Sgl-Allatotropin	MVKVVLVTVLLTICVIVDCFPHTNTKIRQKRGFRQSIVDRMGHGFGKRANTDIYDTYLTKTPDLMTVDELTTNILNSEELARAIVKKFIDLDGDGVISTTELLRPTS*	Obi-Allatotropin	MKTYQSRNLCILSCVSLILVLCCGVDASKSLTKRLGNGFKNNILDRMAHGFGKRTIEDTYELAPSIAETGTRNWMTLKDLADLMTYDSDLAYRAALKLDTNGDGVISMDEFVGGLRGRGTA*
APGWamide	Hla-APGWamide	MSSFINSLTLGVVVVLSVLSCGLGEDHVASVTGDKEKSDFSQRTLDSVHVLKKRAPGWGKRSLEDDVDSDDDMSYDSESPEDILSRADLSKRAPGWGKRTLDILEDYTKRAPGWGKRDSLDVKRAPGWGKRDIDMDKRAPGWGKRAPGWGKRAPGWGKRAPGWGKRAPGWGKRAPGWGKRSDTSCAGIDEEVDYYIYRAVQIGQ*	APGWamide	MCAKRSLFSTVFISQILLTTSLLVDGSSTRAGHNSSPSGSQSSSGIVETSRLKRAPGWGKRAPGWGKRNILRDDILDQSESALRDNNIAALEAESPFAQETDFINDKRAPGWGKRAPGWGKRAPGWGKRSCYGGACLNNLPAFNSFLPTGKTVELNKGDLDADDADLIFIKRAPGWGKRNYQLDTSNQGEESDFRTWGINKVSHNSVETNADAVAKLITKIGELSKNFKTSEESLSANKRAPGWGKRSSDLEFNYGNLQTGKRAPGWGKRAAEWGKRIYGVGVEDGSDDIQKRAPGWGKRTPGFGEGNDGFEIEEDSADDQRLVPGLEG	Aca-APGWamide	MRCSSCLSAPVMLLAKISVVVLLLAIDGTSSSESTDNVVLSSSPDSQKAATSRHKRAPGWGKRSNLNDEDLFADSDSAQELLDSVAALKRAPGWGKRFSGLMSEGSSLEAKRAPGWGKRGQEIDVDEDGSEQEKRAPGWGKRAPGWGKRAPGWGKRAPGWGKRAPGWGKRAPGWGKRSGGDYCETLEKMVDAYIYKAVEVDSRRLADCGSGEGTNEPFRK*	Lgi-APGWamide	MYFSTHLAALFFSLFVLLIQCATSEELSSSLLEAEEEKRAPGWGKRNILSSSEKDFLESKRAPGWGKRSLSALLDDADDWSDDVSQDYSKRGWGKRSLESFAADKRAPGWGKRAPGWGKRAPGWGKRAPGWGKRAPGWGKRAPGWGKRAPGWGKRSSDECSTVENEFNYYISKAVQTQIKLLTNCFESGEKINSPLA	Ctr-APGWamide	MNTLQQVFVVLLVAQLAFFACTPGVQAEEESSTSDLTITDQAAAHRQKRAPGWGKRSDNDNNDDELDNFEGDELLNNLEESELAEDKRAPGWGKRDFDTDKRAPGWGKRAPGWGKRAPGWGKRAPGWGKRAPGWGKRAPGWGKRSVLAEDSEDKRAPGWGKRAPGWGKRAPGWGKRAPGWGKRSVGVASGACQVLKEELDAYISKAVEAETQLEAFCGSNPAAFDLLSRK*	Bgl-APGWamide	MRAHSVSFSSVLLAQIVLLAASLLVELVNSAESSIDTAAQTSSSSESVHTPASRYKRAPGWGKRNGFSEELLEDNENTQELMARLAEYKRAPGWGKRTSSLDIENALSADKKAPGWGKRNAESAFEDDAVDLDKRAPGWGKRAPGWGKRAPGWGKRAPGWGKRAPGWGKRSVDDYCQTLDQIMDEYIHKALEVKGKKMAECGSTDETNEPLRK*	Cgi-APGWamide	MESPSLYLIVIALVLGIVSTDEELIDKRRPGWGKRGSLDFGSNNLPNSIIEKRKPGWGKRGMEDEFEMNKRKPGWGKRAPGWGKRSFNEDLNNFIEKRRPGWGKRTSDLMDALNAMEVNKRKPGWGKRSEMEKRKPGWGKRTVPELSETDLSYSSIPTDSFSVLDKRRPGWGKSWRNITDLTAEDNHLRHQILATQSGKNKGVIHYWNSGSFRQSSESRLSPKGIGYTKNDEPDRFYTTTSVNDPACDMQGFNLVILPDPRKSSTEIFMSPRVWVLTLGQGQMDV	Sgl-APGWamide	MESASIFLIVAALVIGIVSTDDELRDKRRPGWGKRSDIDLETDYTDSIMEKRKPGWGKRDMNELEMNKRKPGWGKRAGLNSEYFDKRSPGWGKRNFKEDIKSFVDKRRPGWGKRTADLLDSLNNEISKRAPGWGKRSEMEKRKPGWGKRTFPEPSDKDSTYSNLPYDISDILNKRAPGWGKRSSDIFVERRRPGWGKRAPGWGKRSNEPTCQDIDLEIQRLLNTILKLEEERRSLCDKQSMTSGEFESLE	Obi-APGWamide	ALILIAYSLTSTTNNAVAGSDSTTIELKTDVKRGKRSVDASQHSGQHHVHRYNGKQSQQQARASISALATIPSELDSYPNDFSSIDFNSYEAKPEEVFTGNQDGEVGQLFVIKQSSGNDETEETEGNDITEELSARTDLSNLNLATETEKRAPGWGKRAPGWGKRAPGWGKRAPGWGKRAPVLRKREFALSTPELEDLDFQKRAPGWGKRAPGWGKRAPGWGKRAPGWGKRAPGWGKRDHFSLGLN*
Buccalin	Hla-Buccalin	MQHMPYIRCFFQSILELWTSPLDTVHQGTMLLRMTPFCLGLITYILLASSTQAEDVVVPQTPDEASESEGKDNVDNDGYFEDVSKSVYDTNNNDDKRQTVDKLGFSGTLGKRRFDPILFGGRLGKRGMDRLGFAGTLGKRGMDNFGFAGQLGKRGMDNLGFAGQLGKRGMDNLGFAGQLGKRRMDNLGFAGQLGKRGMDNLGFAGQLGKRGMDHLGFAGTLGKRGMDSLGFAGTLGKRGIDNLGFAGQLGKRAMDKFGFASQLGKRAMDKFGYASQLGKRGMDNFGFASQLGKRAMDKFGFASQLGKRAMDKMGFAGQLGKKAVDRFAFASQLGKRGVDHYGFMGQLGKRGMDSFGYAGQLGKRQVVDSLGFAGQLGKRGMDGYGFAGTLGKRGVDSLG…	Buccalin	MPRNTQLQQLLLLALVLTLNQLSASDVADTADNPDAFGDNSAVNDQVNLEHSALYAPECQDSEDPDEVEKRKLDGYGFYGGIGKRRVDRFSFTGGIGKRQLDPFSFAGHLGKRVICSTEYFDSSSKRKIDKFGFAGGIGKRRLDRFGFAGQLGKRRLDTYGFAGGIGKRRLDSYGFAGGIGKRRLDSYGFAGGIGKRPLDTYGFAGGIGKRRLDTYGFAGGIGKRRLDRFGFAGGIGKRRIDKFGFAGGIGKRSEEDDFTYDDIDDVKAESENDSHVDKRSAQLDKQVGSISS	Aca-Buccalin	MAHHRGHRHILLYVSLALSLGLALAEDATDPSDDTGSFDDVEAVSEEADLDPYSMSQELNKRPNVDPYSYLPSVGKRAFDHYGFTGGLGKRKIDHFGFVGGLGKRQIDPLGFSGGIGKRYDSFAYSAGLGKRGMDSLAFSGGLGKRGMDSLAFSGGLGKRGMDSLAFSGGLGKRGMDSLAFSGGLGKRGMDSLAFSGGLGKRGMDSLAFSGGLGKRGMDSFTFAPGLGKRGMDSLAFAGGLGKRMDGFAFAPGLGKRMDSFAFAPGLGKRGMDSLAFAGGLGKRMDSFAFAPGLGKRMDSFAFAPGLGKRGLDRYGFVGGLGKRGMDHFAFTGGLGKRDSGEASGDLEEGKRGLDAYSFTGALGKRGLDRYGFVGGLGKRGMDDFAFSPGLGKKRMDSF…	Lgi-Buccalin	MAARKHELVLVLTSVLCFVSSIVGDPNVPSDSQDNSALTQDDFAKRGMDKFGFAGGVGKRGLDKFGFTGQLGKRDMDSFGFAGQLGKRGLDQYGFTGQLGKRGLDQYGFTGQLGKRGLDQYGFTGQLGKRGLDQYGFTGQLGKRGLDQYGFTGQLGKRGLDQYGFTGQLGKRGLDQYGFAGQLGKRGLDQYGFTGQLGKRGLDQYGFAGQLGKRGLDHYGFAGQLGKRGLDQYGFAGQLGKRGFDQFGFAGQLGKRGLDHYGFAGQLGKRGLDQLGFTGQLGKRQMDIFGYRGQLGKRQSIDKYSFLGAGIGKRSVKNTAGIKKDDA	Ctr-Buccalin	MDNYAFMARLGKRGLGDEGEELALEKREAADEDAEISQNRTKRGLDGIMYSPQLGKRRMDSMLFGPQLGKRRMDSMLFGPQLGKRRMDSMLFGPQLGKRRMDSMLFGPQLGKRRMDSMMFGPQLGKRRMDSMLFGPQLGKRRMDSMMFGPQLGKRRMDSMLFGPQLGKRQRMDNLMFGGRLGKRNVNWAEEPAANEVGEFEGST*	Bgl-Buccalin	MLPKNWLHSFVLCLVVLSSCRAYDPDTNEFDGERPEDLVTSDSLDNSEAMDKRKLDRCGFHMGIGKRDDEEDGDLEDVYEKRRIDPFAFSGGIGKRRLDRFSFAGGIGKRGIDRYGFVAGIGKRRLDRFGFSGGIGKRGIDRFNFAGGIGKRPIDRFSFAGGIGKRGFDRYGFYGGIGKRPFDRYAFAGGIGKRPIDKFGFYGGIGKRRLDRFSFAGGIGKRIPDLEEVSAAELSEAANDVEKRSVPSAKSEKETVKST*	Cgi-Buccalin	MWSTNYATTVFGFFCFVQVFVLTVSQHISSHNDDYTKHLENIKFLNKEAEISPKQPADDDVDFGNSDTADDLSDLTEEEKRALDRYSFSGSLGKRGLDRYSFYGGLGKRALDRYGFFGGLGKRALDQYGFAGSLGKRALDRYSFMGGLGKRKLDQYGFAGRLGKRALDRYGFVGTLGKRKLDQYSFMGNLGKRRLDSHRYFGSLGKRALDRYGFFGGLGKRADTLGNSQENIQGADKDEKFEQKRLYPYWYYRQGGSPIYTQTRGIDRFSFAARLGRR	Sgl-Buccalin	MWPTNYANIVFGCICLVQVFVFAVSQHLDLNNEDLTKHLDNIKFLNKQTEKGSPKHTDDSFDFENSDLGELTDEDKRALDRYSFFGGLGKRGLDRYNFFGGIGKRALDKYGFFGGIGKRALDRYGFAGSLGKRGLDRYSFMGGIGKRGLDRYGFAGSLGKRALDRYGFIGSLGKRKLDRFGFMGGLGKRRLDSHRFFGGLGKRAADQYENQGSASSAETPQLYTGEKPMQKRLYPYWYYRQSGRPIFTQTRGIDRFSFAARLGRR	Obi-Buccalin	MWKITNISLVTLLLLHTVFTENSPDKKHLDHLSSKLDRELSLDHLANQLNENIEPLSNRLIGKRFLDPLASGLIGKRYLDPLASGLLGKRNSDVNTSKNYAGKSQKHEILSQTGKQHFDLLDRELIGKRYLDPLASGLIGKRYLDPLASGLIGKRYLDPLASGLLGKRDTHLDSKSDDNEGTDDSSPNDLAINDARKRYLDPLASSIIGKRHLDPLASGLIGKRYLDPLASGLIGKRYLDPLASGLIGKRYLDPLASGLIGKRYLDPLAXGLIGKRYLDPLASGLIGKRYLDPLASGLIGKRYLDPLASGLIGKRYLDPLASGLIGKRYLDPLASGLIGKRYLDPLASGLIGKRYLDPLASGLIGKRDVNPNSGKEDSANSRGNVILDPTTNGSATNKR…
Bursicon-Alpha	-	-	Bursicon-alpha	MITTDKLLMLALLISMTSPMLYKRYKAKWPTLSSSASTSSRSSQSQLLQMRKQLDASYKSMSRFGTRSKASRDTCRAHPLTLELEPPLKLADQCGSLSVLSYGCRGGCSSYSQVDPRNATNIIHSCSCCQPLRFMVSIALLPCRDGHHIRVPFKEALACSCRPCYAEEASKDYIKFDDLLSKPAVETPLPIG	Aca-Bursicon-Alpha	MKAQNVVKKNEGSSLVNAIISESPVSSSSSTCRHRIETTLIAVPGCVPKSLLITRCQGSCHSRSVPEFDTDRQEVRHVEHCSCCKPMVMKFRAVRFTCPRRRQRFFVKRFGFPFRCACRPCANVPEVTAEQPYDY	Lgi-Bursicon-Alpha	-	Ctr-Bursicon-Alpha	MCCWTGTLASQILWLLITMTTLTSPFLQVDTEAGKDLLLPPLPPHSLHELATSAANSIPRAIAPDRYSRQATLMMAASSPRIGVRSSLIGSSDTCQVDPVRMSIRPPRKYAHLCAPTTEISFGCRGGCPSYSRIDARNTTKVLRSCSCCRPTGFGFRLVKMKCEGFSLRTTVKFALGCHCRPCMASVQSVDIQRLRDLLRATSIANIG*	Bgl-Bursicon-Alpha	MTLTDTILMLAVLVAATSAMLYSRYMPGWTSSTRSAYTSSSPSISLIRLRQGLYNLQAKSRLDARSSVFSRDRCTVQGLILRLDPPLRADDNCETAYIQTSGCRGSCPSYSQVEQRNLTNIFYSCSCCQPIRFTPAVAVLPCRNGQHIRVPFKKVQACACRPCDVNEAPLEIAKLRDLLTKAAVDTPLPIG*	Cgi-Bursicon-Alpha	MLVAFVFILGATTEISEARCNKRFITHVIRKRNCYPRALLSVACLGTCTSYTKPSVDNPGSVERFCECCRESSSRQETVNMICLDEATRGLTNISLSVMIPTSCMCRPCSVLPDTIVPAEQHIFQH	Sgl-Bursicon-Alpha	MPIPGQDMLLILVFLLGATSGIIDARCGIRFIYVNLQPENCKPTQVLGFGCRGTCTSYTKPSYTDPGSVERFCECCREDESIERRVLMECHDSAGIFRNVSLPIRMPRSCSCRPCSVLPRRVTPGEEQLYGHSGRKRSKGQQRTEADAKFIIDHSKERVHQLHEKHV*	Obi-Bursicon-1	MHILSSLLVLLASLHHISSQDCQTLRSEINVNKYVNTVYRGRHVEVRCTGRLALNKCEGTCWSYESPSVTDPRGFKKKCNCCREKKLVSRKIVLDECYDSVTGTYLPGLYPTISIKEPIECVCRGCASFI*
Bursicon-beta-1	Hla-Bursicon-beta-1	MAIGPREVAVLHVLFAAIFTTVVATVRPTYWQDNCQTLSTEVDIVKNIVAEVNGQRLPVSCVARLTVNKCEGVCESVLSPSVHHYPFKKDCRCCREGEQAQRRIVMQECYGEDGNLMPHLHPTTTIKDLRNCGCFRCEN*	-	-	Aca-Bursicon-beta-1	-	Lgi-Bursicon-beta-1	-	Ctr-Bursicon-beta-1	MVMTLTLTLTFTLTLHSAGAQGNDNCQLIPVRENIIKETTVLHLNRQVQASCSAEVNLHKCEGQCESKVIPSVRHARGFRRDCRCCKEGTIRTRTVPLTRCFHNGELLVGVMDMAEVSDLESCSCVSCMN*	Bgl-Bursicon-beta-1	MVFSYSDLAHFWTVLVSLSLFPYLVFTSSNDDCQLLQSTVPIARVTTALNLGYPVPVVCSGDVMLNKCEGTCESSVSPSVTTHPGFKKNCRCCKETSTTTKEVYLPICVHNGKIYPDYQHKIWVKEITGCQCQACTG*	Cgi-Bursicon-beta-1	MAKSGVFLTFLGVVVCVQGRLFRTSPETCSTERTEMDITRTLTVTHEGVLKTVDCVARVSVNECEGSCLSTASPNVHTYPDFKKDCKCCKEGRLVSRQIALQECYSNGVVLAGVQPTTSITEPADSDCFPCTN	Sgl-Bursicon-beta-1	MVTNNLFILLGFLACFRLTDGSRFQSSARSRFSSFRRPEAIDTCTTKRIEMDITRTLSVTYNGVQKTVDCTARLLVNECEGVCQSKAEPNVSTFPDLKKDCKCCKEGRLLSRRIALDECSENGILLPGLQPSTSITEPADCACFPCRN*	Obi-Bursicon-2	MRLPMAILLTGSLYIYAVSVFVPERFVTANPLSLSFIRTAYTTNNTKCGVQGVIMSIHPPREKVHRCSSSIIKTFGCRGQCYSYTEMNSNLTRVIRSCSCCQATDFGFQQAIINCKNGEKMRKIVKFAINCHCRPCVLKPRVTLKDLRLMLRMSTRKHWPN
Bursicon-beta-2	Hla-Bursicon-beta-2	MWLKVIFLLLTVYILPTSGFVFNIRSSPDPNRNRCGLRWIKMTIHPPTMYASRCQSATVYTRGCKGGCESYSKIDYERNATNIQRYCSCCSQTEVASIRKPALLPCSDGNVLRIPVKMALTCHCRPCSMSVQQIDIFDLRRLLASSWPSSSIFGG	-	-	Aca-Bursicon-beta-2	-	Lgi-Bursicon-beta-2	-	Ctr-Bursicon-beta-2	-	Bgl-Bursicon-beta-2	-	-	-	Sgl-Bursicon-beta-2	MLIRLFPVLLCISSQCLTVSLARCRKRPVREIIQQKNCIQKMTLNFACQGTCDNSLSNILSADGASSRSCQILASRQKIVRLRCFEKGDLRKLRSRDIVVSVVTQCSCGSGLSATNTGTEERQIAPTHATRRSRFQNFLQRLASGRRRGASGRPRGRRRGLDNAQN*	-	-
CCAP-1	Hla-CCAP	MAELLWASSGSPGLRQLKLAYINSLYFNGHFSISRWAVFEDRKKCNAVFYKMPSCRLLCLLLLPLLAVSASNDLEEDYVPQSKSPDSHILSEPLSLPPDSRLMDGRLNVPRGWANLLDRLSSESSGQVRTSDAQTKRVFCNGFTGCGGRLRGRRAGPDNKSPESHILPEPLSLPPENRLVDARLNVPQAWAKLFDRLSSDSSDQGRTLGNSDALTKRVFCNGFTGCGGRFRGRRRQHPPVLGKRPFCNYFGCGNVGKRSEPPTKAVAQRLMRLPDVIRKRLFCNGFDGCRGGKRALYSNWLSKLQGIADDL*	CCAP	MQELSVATSTSNRFVLTAVCILVCGTRFSTSEPSGDIIQLPGSSERNNQLSFSRPDSFRSISDDEGLRGLSDLLLVKQSMLNLLSKPSPAAADTELETEDQTDASTLTKRVFCNSFSGCGGRFRGRRRQQQPVEKIGKRRLPNLRKRPFCNSYGCFNSGKKRFSPASSKNLGSNMTPLSDALLQDRIKKLFCNGYGGCQNLGKRLGALDAAVAKAAGDEARLSLPLTTRSLLNNLGGMKRVFTSQFDDDIDSLIDSMRR	Aca-CCAP-1	MLPVDDTPSLTDLMTSGVAMSSGGGSKSPTFKRVFCNGFTGCGGRFRGRRRQLNEALGKRRLSQQRVGKRPFCNTLGCYNGGRKRHEEEEVESAKVEEQLKELVSTSSRLPVLSPRGGWNLDEKVKRLFCNGYGGCQNGGKRWGKSGMGTKQTGASSRNLALPLSDESLKKLSTMKRFFAGGYDNDMEGLIDSLKR	Lgi-CCAP-1	MICSHFHCLLLASFIVLTVSEDFSPLYLNENEDTNDLLKDTDSLPSSNNIYDSIPPARPPFPLLSLLFSKLKMEGSEKQAVIKRVFCNGFTGCGGRHRGRRRQYTARILKRPFCNNWGCGNGKRALEKVPVPFGKNLARKRLFCNNYGGCRGGKKRTLYSNWLGKLNGVADNL	Ctr-CCAP-1	MVLRGCLLFYVLVSLLAQVAVAATRKESDDRMLEEITKGGMEDPDSILEDNNALPNPLPPSLLLQLLRSEAALRQQQQQQQQQQPPQNMDSDEDDSSSNIINNDGNRDDNNDIVKRVFCNGFTGCGGRHRELSRRRRIFGKRLIPVLVKRPFCNNFGCFNSKRNPLAAPSVEGFRARLLSQGFAPAAEGETPGGKQGGVYKGKRLFCNGYGGCRGGKRSLFSPWMSKMSSVADSLR*	Bgl-CCAP-1	MTYEHVSTTLDWLKLVTWLSLTMCTVSVHAEKPGQYLNFPLTSTVNVHSLADDQSPPRLQHLKTSMLDLFSPSPDLESNRALDSAPTTDGGFEKQKRVFCNSFTGCGGKFRGRRRRLKKTFGKRFLNERLAKRPFCNMHGCSNSGKRSGEVLYGDDALIGQLKFSDDELSSLKLNRQLCNSLGGCQNVAPRVGLLERLKQLDSDQTDSLGKRFYSGGFDEDADALAENMGR*	Cgi-CCAP	MVSFQQSFATCVGILTILSFCQCSQYSYADELLQKNENSKLGVKKLAALLANELLSEDKDITQKDKRVFCNGFFGCSNGKKRSNSMNLNPLDYPVDAPEPETKTDFRKRLFCNTGGCFGRRKRSTSQTLERRLNNRGSKDGNQ	Sgl-CCAP1	MCNTMSYQQSAFLVACFGILTIFSFCQCSGLTDGNEYLQKVENTKQNVNKMAALLAEELMKEDNPSSESREKRVFCNGFFGCSNGRKRSQSGSLDIAPFNYPIDEPEVQPSFRKRLFCNTGGCFGKRSGRFRRFMEKLEKADNLKE	-	-
CCAP-2					Aca-CCAP-2	MTSSVLSPTSSFLLVLVLNVMLASIPLSAVTADEFFKQPAESKTTVKRSTSGESKPPRLLELIEMRDAVSSMLPVDDTPSLTRNFDGTSGVGDGLQAGGSQVPRLFKRVFCNGFTGCGGRFRGRRRQLNEALGKRRLSQQRVGKRPFCNTLVVIMVGVNATKKRR	Lgi-CCAP-2	-	Ctr-CCAP-2	MVSRGHILYVILLPVLARVAADDADEQIMSEMMSGDHDGASNSNSLVRSSEHSSLPRSLILQMLRSGSLRGAASSAPLPAPPAQPLLSRLADKAEYGQDGEVTKRVFCNGFTGCGGRHRDRSRRQERYGKRLIPVLVKRPFCNSFGCYNGKRSSSSFSIVDPVAAYRARVFAQMMAAAESARRGEEGERPAGVVVPGKRLFCNGYGGCRGGKRSLFSPWMSKLNGVVGEGM*	Bgl-CCAP-2	-			Sgl-CCAP2	MMQPIGAIFSALILVLSLAAYTYCQEPSQQNIDLLRQLLEGNLELVPNEDLTNDEEEAGVESGYIPLQVPESQGPSYEKRGICPYWGCGRRKRPFRFRTKKLFCNFGGCFNGRKRSLPLKTRFLMRGRK*	-	-
CCK/SK	Hla-CCK/SK	MDNFMTTVTAVILAFVCVTSLPVNEGDDVSNLANLLGKLRSLHRKRLDSHSWGHFKSTSGNDDKPQSSDLADSTSDVAEDPEDVLPEDVPDMRKRQGAWSYDYGLGGGRFGKRNYGEYGFGGGRFGRDVDHVDLSD*	CCK/SK	MEIQIISFILVSCIFVVSAAPANDRRQDLQHLLSVIVNIRDLNRMRHSIPSLTNLDTENTEKVAHFLNLSDSAVLEAAEDKEPQKKGVMGKSAGQLPKRQGAWSYDYGLGGGRFGKRNYGDYGIGGGRFGRDVDHVDLSDANDADVSS	Aca-CCK/SK	MEPQLLSVVILVLCACAASALPTNSRREDLSHLVTLLGKLKNIERARQNSEGSAQAHAQEAWEGPRVSSFPETEVTADVIPDEVSAAKGYLGQRPATGVVNKRQGAWSYDYGLGGGRFGKRSYGDYGIGGGRFGRDVDHVDLSDATENEITS	Lgi-CCK/SK	MDQNISLLIICGLFVLVTSLPLKTDDDNVEHLVSLIKKLKSLEKRPETNSRWLDHQLHHLRIDNSPAEKSDSLTSGERDSGILYRSLNSDMDTPSKRQGAWSYDYGLGGGRFGKRSYDDYGIGGGRFGRDVDHVDLADGVLNGA*	Ctr-CCK/SK	MEHSQHLFITIVAVLLCGCVTIALPTAHSDSVQDLSHLVNLIGKLKHLDTHINDDNWALISNDDDDDTSQTGISTGPASPSAADKVEALRKGFLGFNKRQGFWSYDYGLGGGRFGKRYYGDYGIGGGRFGRDVDHVDVADSNDSTL*	Bgl-CCK/SK	MESHVIALAIVLFYACATYAHPPNSRREDFKQLVSLLGKLKDIDSSQLAHQTSGDIVTELQDSVDPKAGVDKDALSKALLNRYGMMVKRQGEWSYDYGLGGGRFGKRNYGDYGIGGGRFGRDVDHVDLSDANDPDLLS	Cgi-CCK/SK	MKNSLEHLLISSVLVLCPLFTLTKGNSHAQNSIIQLSKLFSNLQDIHDAKQTQEENTKDQVRSDTRKQRGEIELILALGAPVHVESLQHNDKDTQTDTDKSAWDVDFEDDQQDVEKRQGAWDYDYGLGGGRFGKRFDYNFGGGRWGRDVDHVKQGQAKMKNSLEHLL	Sgl-CCK/SK	MKNSLEHLLMSSVFILFLSFTFANGSSQTEDSISQLSKLFSNLQEIHGTKHNQEENTRDRLRSDTRKQRSEIGLILALGTPVNMESMADSDKVMEEDKHTDDLDKSDWDIDFDDEEQEVDKRQGAWDYEYGLGGGRFGKRFDYSFGGGRWGRDTDHVKQENSD*	Obi-CCK/SK	MNRYIKVGIALMLLYITLANFTTATNFENSGLSTTLSKYKKMTKVLQKRNGGLLDNVLNDRQFLSPHFQSKRINLETRDNGFANAEDDGNKRRGAWYYDYGLGGGRFGKRDYDEYGLGGGRFGRDVDHVDMSDA*
Cerebrin	Hla-Cerebrin	MAEMVSCSKYILILAFLLLACVSRDSSAAMIRPYQSQLEEKARQEVIHLAARIIKLTMYGSRLEMANKRNGGTLDSLFNLPDLSDNGR*	Cerebrin	MFPFRTLLTLTTLVAACWLLQTATASPIYTSSIDQKTRQDIFILAIRIAKLAQFGGGSMDDYQKRNGGTLDALYNMPDLEDAGR	Aca-Cerebrin	MFGYRSLLVLLVTLSLCLLLQSSHCSAVRTYGNDLDARARREIISLAARLIKLSMYGPEDDSFVKRNGGTADALYNLPDLEKIGKR	Lgi-Cerebrin	MNSCTKCLLLLVFVGLTVLVKLSESSPLRPYQTQIEEKSRQDIITLAARVIKIAMYGSNQYDVIKRNAGTVDHLLNFPDLSVGK	Ctr-Cerebrin	MLSLSKVTVLVALTTLMVTWVSHETHATPLAPYSAGLEERSRQDIITLAARIIKLAMTGRSLDSGASKRNGGTLDTLYNLPNLNDIGRR*	Bgl-Cerebrin	MYKNTLSYRTLLALVMVLAITWLTHGTDAISLRPYVGSQYDHKSNQELISLASRMINLLKYGYDFDDGITKRNGGTADTLYNIPDLMHIGRR*	Cgi-Cerebrin	MRTETCVTWVVCSLCLITLSVCRPIKDVEGEAFASDNEERLLLAAKLLQQMQQRQYGIRYYPIIPTHKRNLGTVDSLYNLPDLLYRGKR	Sgl-Cerebrin	MATVSQITWFFCSLCLFTSSVCLPVSYDKEKQEIEQEERIVLSAVRLLRLLNQQIPQSNHQTQKRNLGTVDSLYNLPDLFYRGKK*	Obi-Cerebrin	MQKFLVVMIIAAILACVSTFQSVEARQDEVTEIIGLASKILEIAIHMDKPRGLSKRNHGMIDTLINIPDLDKVGRK
Conopressin	Hla-Conopressin	MMMLALCLQCMACGPGDRGQCVGPNICCGSDIGCYFGTQEASICQKENESSTPCVIRGATCGSRGQGHCVSEGMCCDEEACSFNSRCDVRARDQPTSKADLIKLVQQLLRSKNYD*	Conopressin	MPSYLHVPSRPVCVIATVLFTFVVFLSSGSEACFIRNCPKGGKRSMDSPMLPRRECMKCGPGGVGQCVGPSICCSPHFGCYIGTPETEVCQQENDSLLPCSVKGDVCGARDSGNCVANGICCDEDSCAVNERCRQSGVTPLDETKKTTRSDILKLIEELLDNRNSD	Aca-Conopressin	MSHSSMSPLSVRTFVLVAGLAVISFSVVADACFIRNCPKGGKRSMDMQLLGQRQCMACGPEGIGQCVGPNICCSPHFGCHIGTPETEICQKENQSTSPCSVRGETCGYRDSGNCVANGICCDSESCAANDRCRLRKETSRIGFDDTQSSRAEVLKLIQKLLRAKEED	Lgi-Conopressin	MCFSSFQYILSLFVFMCVIFGANSCFIRNCPTGGKRAIEASEIGHKCMSCGPGNVGQCVGPNICCGRFGCYIGTKETEICEHENDSTVACRVEGKLCGSRQQGQCVANGICCDSEACSQNPKCEEEEEETKEEHPREKILHLLQRILEENSFH	Ctr-Conopressin	MQGYGMKFSVVPVVLFMLLASSYGCFIRNCPRGGKRAFDGGKPCMPCGPDGAGQCVGPAVCCGKSFGCLVGTREARECEKENESSTACSVQGRQCGRDNSGRCVAKGICCVADACSFNERCAEIERNGRDELLGLIRRLLVTHQYE*	Bgl-Conopressin	MSSLVGLSLSSLVTAVILTLSFCDACFIRNCPKGGKRSLEGGIVPRRECMKCGPDNSGQCVGPKICCGQDFGCLIGTAETVVCQQENQVSTPCLVRGEVCGARDSGYCVADGICCDSGSCAMNERCTKQGDIILDGQTSRSDVLQLIHKLLRERDYD*	Cgi-Conopressin	MQKMECCKILHLSLPQVSLLLLMFTTLSSCCFIRNCPPGGKRSMGIVSQPTKECMSCGPGLLGQCVGPDICCGPFGCQMGTSESNICGKENESTTACAISGPPCGSRNQGNCVADGICCDTGACSFNTKCKLNSEPRDVQILSLLKTLGLIETKAYNNAGMS	Sgl-Conopressin	MQKMEYCKTFPLNLTQFCLVLLALMTVSNCCFIRNCPPGGKRSMDIISRPGKACMACGPGLQGQCVGPDICCGPFGCFMGTSQSSVCEKENESTVACAVSGPPCGSRNQGNCVADGICCDPGACSFNSKCKSNTEPKDVQIFSLLKALGLLETKAYNNADMS	Obi-Conopressin	MSQNCFAIVQLLFVLFTVCSLFIATTDGCYFRNCPIGGKRATPMSEQGSNQKCMSCGPNGEGQCVGSNICCHKDGCIIGTLAKECNEENESTTACSVKGVPCGTDGQGRCVADGVCCDESSCFTTDRCDRENHRSMAMQKLLEIRDGIYYKK*
Elevenin	Hla-Elevenin	YRRFVFAPRCRGVAAKRAQAAIIDAADSDDMPALNKXPSLVDNDWNTDDTDSFQRLQFLASKLGLRPVNDDNTVRWCIYCNLELCNVFSAL	Elevenin	MTCQAVYRTILTTLACLLLSGNYFNVHVAAARRPGRVDCTRYVFAPVCRGVAAKRNVLPTRSSDEDMSPPNYLDDFVLMSFLSSVREQNLGRTRNNVDNLRQLLKQTLPIEDQRQERIFQEQRNEAEERSLLPKLLVRRQRSPGRTIH	Aca-Elevenin	MPCTPNSHRLLLVTALCLLITSLFAQQKRRPRIDCTRFVFAPACRGVSAKRALDPRAVTLDENVAPSFSDLDDEILRSFLAYNRHKQQEQAAPRPDAPSSLLRLVAQRGLRHRTPHSLHRPVPWSVEQSFLKTGSDGALSWPNSIKSLQED	Lgi-Elevenin	MNRTMAEKVFSIFGLLLIVLVLITDSRKLDCTKFVFAPKCRGVAAKRNTDYNFPIIPSHQRLQSKIVPSLEDNWTSEDDDSLQFLKGLRYLISKMNNKQPSPPYSTDDSRFWRKFFPSR	Ctr-Elevenin	MAVTSSSTGLLLLLLSVILAASVVSARRIDCTRFVFAPRCRGVAAKRGGHSLSVEDTTELDDTFTDSVLGMGEANRDEDSEKFLRLLLDLSRAIRQPITPSARGKELLERLLRS*	Bgl-Elevenin	MMSCLAYVYRWSVLSLILLCLVCSSESQRRRVNCENYPFAKMCRGISAKRSNVQASSPVNDFQSPHTLEDMIQRSYNSFRSNLNKKSLILKSLQAPLSESEGQTDRRFVSSGLDDMDSHENSYLYA*	Cgi-Elevenin	MQVTTIENVILAFVLFTMTVAGQIRARRRFCETYPFARRCLGVAAKRDVTGLHTENSREQRLLEIENMLENERFTERTESPETLFPTTYVKRSPVSLLEQILNNRRRFGLKRQSGSCGI	Sgl-Elevenin	MQVVTVENIILAIFLFTMTGAAQRRPRRRFCEVYPFARRCLGVAAKRDVSANMNAEKNRELKLLELKDLFDRKGFTAKTDSRRSLVSSEYDVLINAINRILHKKQTLSGSKHQDKVFLQFDGFSQPHEDYPVNFWQSR*	Obi-Elevenin-1	MLQLCNKTYQKCLVWTIAILLITVHISEQSSPGMKRKIDCRKYIYAPRCRGVGAKRSFPMTNFQDKERDVGNSEHSDRDVLLNYLLSKGEGRDPYYNTRSYSDEPTRY*
ELH	Hla-ELH	MKKQTNREKTSMRTEALRSAMPRLSVCLAVLVYTCVSMKLISAEESNSQSNTEEKYFSPGEPTWPTGNGVYEDEIQALDGDGEGHVKRVGDRENRSSGTSLWTKILNRLGKTQETFGTSGQYPNLPGKTGYERRYLAPQSALSKLKRNLSGMPSFEKERALNDGKFKTQKKRGLSINGALSSLADMLSAEGQRRDHAAALRLRQRLLVAGKR*	ELH	MPSVVMGKHSAMFLLCLQSLLALSSSAMPVPAVDEMKVPAERQLEITGKQPEKGLYPHVTADDILNSNVGDFLVRNDEAEDHDNDAVILRHMADTRTIQEDKRRLRLVKGRKSGDDKGSVQQESHQHSLHKREAERDRRTWSISNALTVLTDMVVEHEQRRLAAEREALKQRLLELGKRSQNNAVVKADVSNRREQDFLSFLQAALGSSENV	Aca-ELH	MKRPNNRPTNTMSLILCLTLSSLCVSSQSASVHGKNFATNRAVKSSSPFVVLSPDDNVVSMSGENGYRSALREAFDKSSRDYDDNGEDVFSNEKRRLRFHKRRLRFDRRDQDEGNFRRFPTNAVSMSADENSPFDLSNEDGAVYQRDLRAPRLRFYSLRKRAAGGMEQSEGQNPETESHSRRKRSVLTPSLSSLGESLESGISKRISINQDLKAITDMLLTEQIRERQRYLADLRQRLLEKGKRSSGVSLLTSNKDEEQRELLKAISNLLD	Lgi-ELH	MLKLTVLSVFLLYVIMTSYAMPRSYSQVPEELSSQDQSRDYYEPLNAILHRLRELILMQPHSLRETIRYTQITPTTPIPIAMKKRSRLSINQELKSLANLLVLRENKRREAQKTKLRSKLLSIGKRSMPQNQDRDHVIEETPVSDRDMFLTELFAEISEQEMTYVLGQVLGSEIAAKGGNEYQGQERLPYEI	Ctr-ELH	MTTMAFLLPILAAFFFLGLSSVQGLPTSKASHVTSGVAPERGLHKVTARSSGVKALTKRDISLNQDLKSLANMLLAREYDRILSNRMNREFLRKIGKRGSSSLVGGFEDVMDLLPGEPQEDSLPSWWKCSDCDEENKFGRNSAPSSPPPSPRNRWGLAGSP*	Bgl-ELH	MLTTLSRRYKAFKKLTFIGVTLGLLVTLSPHSVEAESFRARTRDQLTDAVRTPDSNLKLTKQEDDTPGGSAFPPLQSHVVKRYPIGNDLELLANMIVGIKKQQNRQEVMDMLEEFGK*	Cgi-ELH	MKMKLNVMAVIVTALFVSVDAFILQDQDNQPDLSEADSIPVEKRGRLSLTADLRSLARMLEAHRKRFIASRFPYDSIRKKLFRYGKRSPVPETLEYNEGEDRSNALDSEFPSLKVEEESPIYNIKRQRLSVNGALSSLADMLAANGRQRMMSEMAMNRQRLFGLGK	Sgl-ELH	MNMKINLAALFITSILCTCSQSYILQEEENQPVGSSSLEEGSSPMEKRGRLSLTADLRSLARMLEAHRKRYLASRSPYDSIRKKLFKFGKRNTLPERQLHDLESSDESGDLTQYSSKTSDELPIYTIKRQRLSVNGALSSLADMLAASGRQRMRSEMEINRQRLFGLGK*	Obi-ELH	MLKSILIMSVLLSLMIPNMVLCRNRPDTLNSVFLSNDYETEDKKLSAYDDGTFRSDFDDSGGVTGEGSKTKQLLYKIQNGINSNGVEEDLGKNNDEYYYNNDNGNIVTKNDGEKKLKLLTLYPTLQKRQDTSTNKDLYSITKDDFDNEPFFDPVCRCWITNNDKHMMNRRQGYSINAPLTAIARILEESRKRMEKNKIREKLLDIGRK*
Enterin	Hla-Enterin	MFVSGNDQTSDDTAVEKRRSPGFTHMFVGKRMPIELESRSPKYGYYFVGKRMPTAFQTRLSPKVGRWFVGKRPYAHRMFVGKREMEMNDGNVLDNGDDWENNVPYGDSELADGYYENKRLVNPFVYYALGKNKNSGNTP*	Enterin	MIFKIPPLWCLAVALLISQAPVHCDEKETTHSQAKRAKRDEVSTYGNDFTENNHYGVPYLQLSSHNAWPVDDFTKSDTPVTSYRPHAFGKQYDDNFLSLLQSLPQYETRNLLLSPRETRSKLRYFHSFVGKRNPEVDTNDQGYLKEFETDDDDSIDLIRRRTPQFSHNFIGKRQQSGTNSFNVWKRMPVQLFSRRAPHYSHSFVGKRSGNGDGYNGFSNVFPSGVSHVYPYSYMETEPWPSASNQRLSEGNNFENFRSEFPLQFTDIPSVHYLVKRASGVEKRGPSFGHSFVGKRAPRFGHSFVGKRAPRFGHSFVGKREEDDAEIIEKALLNNDFEDSIAYPIVPEDNVIQNDAPFDSDYSEDLDESPEKRQQRPNPNPLNFMGKRPSFTHSFVGKRA…	Aca-Enterin	MAKHDVTVMTLLLVVCALHVFDAQGTDVKLNDGFLRSGIMNIPFQRRVSPKYGHNFVGKRSGFQSPVSPS DYFIPDELNDEDESPNMDTYALFRELLGEYPSSELSDDDVIRPYPVVPWAWDRFENKRFSKENEKRGSPG FSHSFVGKRMDLSALEKELIAKLKAADLLSPLETEAPGKRRLPSYGHSFLGKRMPVDVFPRAIPSYSHNF VGKRSGNGENYFDDLDTFGDISQRADLGFTHSFVGKRGNTDFSRNPLARLSQVQNRAIPNFVHKFVGKRS VHNIVKRSSPFYGHNFVGKRDFEDASEGLDEEEGDIDGYSDDLDVKRVPGYSHSFVGKRIPGYSHSFVGK RTPGYSHSFVGKRVPGYSHSFVGKRVPGYSHSFVGKRVPGYSHS…	Lgi-Enterin	MEFLKAEDSQQAAADKNDILDRETRLNPKFSHRFVGKRFSSDDDIELARRLSAKFQHRFVGKRLADEDSE ELVDPEDKRAPSFTHRFVGKRYNPKFQHRFVGKRLADDASDLLESLEQLEDGDDVDKRANPRFSHRFVGK RLSNYISRRYSPRFTHRFVGKRLSEALQLRLSPRFGYRFVGKRYNPKFNHRFVGKRSEMNDNMADESGSD PELYSIQGLDNQVL	Ctr-Enterin	MLAPKGLACITQLLLLLFSFVLITADSEIPDSSNVEKRSVPLFGNHFLYKRLLKLPYQRRQYRSRYEHSFIGKRSVDSDLENVDLDDLLDELEDLQDNNYDKRVPSFGHRFVGKRIPTGLGIRAPTFGHRFVGKRQPMFSHRFVGKRVPDGIDERAPSFGHRFVGKRAPAGLQNRAPTFGHRFVGKRVPDGFAVRAPTFGHRFVGKRYPDGFAARAPTFGHRFVGKRDEDDEFNDYESSDYYHTIRKRFAVDNYHMEKRAPSFGHRFVGKRLPGGISERAPSFGHRFVGKRIPNGLDTRAPSFGHRFVGKRQPTFGHRFVGKRIPDGLEERAPSFGHRFVGKRIPDGIDERAPSFGHRFVGKRVPAGLDERAPSFGHRFVGKRIPDGFEERAPSFGHRF…	Bgl-Enterin	MAAQHCTGFLTFTLLLVTLYSTKADSEQNKMLSLVKPTPGIGKQILRLRFQRRVSPKFGHNFVGKRSFGHNVVWKRSSDFDPTRGADLDHLSIDSRAARFSHSFVGKRAEDLQADEFLRELLERQTIDKLNNNDDGDVNIEERAGPGFPHSFVGKRYDGGESSEDESEDDLSEDKRGAPRFGHSFVGKRNYAVGILNRRGPVFAHNFVGKRNSDDIGKFLDLERRRVGFSHSFVGKRVPPEDFETKPFEQQDVSEHYLEKRSAPIRNKRSLRPSFDHAFIGKRDDDTFDEDIPVDERATPRFEHAFIGKRAPSFSHSFVGKRAPAFSHSFVGKRAPAFSHSFVGKRAPAFSHSFVGKRDEADVAKRAPKYAHAFIGKREAGTEPRLEDNLDDYEEKRAS…	-	-	-	-	-	-
FCAP-1	Hla-FCAP-1	MISGDSPILIRQFRRRCFLRSGLHSQSASRLLVTGREAQYGLCRPVSDVPSCHDDEVASRDVPLPEGEPDATEMRDYKRGLDHGLSSFYKRAIHSGMSRFYKRGQNNGMSSFYKRDRGMSSFYKRARENGMSSFYKRDPMRHVSNFYKRDLDHVSSFYKRARGDGQSSFYKRSRDDLSGFYKRGINEGMSSFYKRGVDGDTSSFYKRAPGGDVSSFYKRAPGGDLSSFYKRAPGGDLSSFYKRARGGDLSSFYKRAPESDLSSFYKRGFQDSSSFYKRSRGDGLSNFYKRARDDVSGFYKRGLNEGLNSFYKRSVNDGISSFYKRGLSDVNSFYKRGLDNNMSSFYKRSGDDLSSFYKRARNDLMGFYKRSGDDSDLSSFYKRARDELSGFYKRGLNDV…	FCAP-1	HGWKRGLDSLGGSQVHGWKRGLDSLGGSQAHGWKRDDEKRNLDSLGGYQVHGWKKRSTGSFKSNQLNNKDNSKINEGNSSGNLSDGVEESLERLAGENKLHISDTVNGNNKGDLGVDNGGTLSANYTTKNIIPGEDSGDKRSLDSLGDSQVHGWKRQQKRGLDSLGGYQVHGW	Aca-FCAP-1	MTFAASFRALLCVLFCAALVHCKTRTKRYVPHSELWRILAVVDELQREQAAEQRQEDALALALRSDIAGGGGGGQLADNVRWFPETYDYGALADRDVDKRVFDSLGGYEVHGFKKRGSLDAIPQDTDASSDKRALDSLGGFQVHGWKRALDTLGGFQVHGWKRGSGAEKRQVDRLGGFQVHGWKKRALDSLGGFQVHGWKKRGTGGQMHASSPRVVPWGSRSLLADTQSGHRWKRDTELVENRQTTGQQTEVNKRALDSLGGFQVHGWKRSGEAGKRQVDSLGGFQVHGWKRADDQGKRALDSLGGFQVHGWKRFDNSAGEKRALDSLGGFQVHGWKRAGDKKSLDSLGSFQVHGWKRFDNDISGQKRSLDSLGSFQVHGWKRSDQDNKRALDSLGGFQ…	Lgi-FCAP-1	MLSKVYMLCLEIFICCKISSILTSQLETKVTQKNEVRREKELYPLMNKKSEESFTISDYDDVDESAEKRYFDTLGGAFVHSFKRNSNPSKNKQFFEKLKNLLKVS KESSHKRALDDLGGINVHSFKRGLDDLGGVNVHGFKRGLDDLGGVNVHGFKRGLDDLGGV NVHGFKRSLDDLGGINVHGFKRGLDDLGGVNVHGFKRGLDDLGGVNVHGFKRGLDDLGGV NVHGFKRGLDDLGGVNVHGFKRGLDDLGGVNVHGFKRGLDDLGGVNVHGFKRGLDDLGGV NVHGFKRGLDDLGGVNVHGFKRGLDDLGGVNVHGFKRGLDDLGGVNVHGFKRSLDDLGGV NVHGFKRGLDDLGGVNVHGFKRGLDDLGGVNVHGFKRGLDDLGGVNVHG…	Ctr-FCAP-1	MVPMGVCRLWVLAQVCWVGVLLMLPLSACHGPLSELDTCSSPSSVCSEVLSGESPQRRCTCSEGKECKARFRVTDKLWFGTCGPIEELPLCERHQTAVETSVDKSAIKVVCRCPYDQRWEDETTFLHNLSCRGPQQDNNNNNKNREGGQDDKERAGLTRRDVSQMEEPLSQDSFRHTLQQLTDTGDQGSNEDLGTTEDENDDEEDFLTSTTGNQLTKSEEEEEEEEEEKEEEKRDQLSRFYKRLGDDVSSFYKRGRGNNDNAFYKRAADDLSSFYKRARGDASSFYKRARDDASGFYKRAPSDVSAFYKRAPGDLSAFYKRASNDVSRFYKRAPSDVSAFYKRSPNDLSAFYKRAPSDVSGFYKRAQEDTSSFYKRAREENNAFYKRARDENNAFYKRG…	Bgl-FCAP-1	MRTELFLLVILPYSLMSAEVPDGDIKKKSQSQVFQYETRPGDPQGSEMNKRSIDSIGSGFIKRPLDSIGSSFIKKGIDSIGSAFIKRPIDSIGSSFVKKNIDSIGSAFIKRPLDSIGSSFIKRRFHHYAFNKRPLDSIGSSFIKRGIDSIGSGFIKRPLDSIGSSFIKRGIDSIGSGFIKRPLDSIGSSFIKRGIDSIGSGFIKRPLDSIGSSFIKRGIDSIGSGFIKRPLDSIGSSFIKRGIDSIGSGFIKRPLDSIGSSFIKRGIDSIGSGFIKRPIDSIGSSFIKRGIDSIGSGFIKRPLDSIGSSFIKRGIDSIGSGFIKRPIDSIGSSFIKKSIDSIGSGFIKRPIDSIGSSFVKKGIDSIGSGFIKRPLDSIGSSFIKKSLNSIGSGFIKRPI…	Cgi-FCAP-1	MKMHSVLYLGLLFSICYQTSAGDNKVQRYDPSEYNDLLQLLQGWTLTTPSASMTTLPPLDNLGGAVVHKGYRESGDIEGDLYQQEPKSDNGVPENKVSSDSLDEDYFERFQDKYPSESEFDKVSETYNDEDPSDDKEKRVLNSLGGFSLHGYKRGLSSLGGLNLHNFAKRGLNSLGGMSLHDFKRGLSSLGGMSLHNFNKRGLNSLGGFGLHNYKRALSSLGGFSLHGYKRRLSSLGGMSLHGGLNKRGLYRPGRMSLPGGFSKRGLSSLGGMSLHGGFSKRGLSSLGGMSLHGGFSKRGLSSLGGMSLHGGFSKRGLSSLGGMSLHGGFSKRGLSSLGGMSLHGGFSKRGLSSLGGMSLHGGFSKRGLSSLGGFRLHGYKRALSNLGGMNLYNFKRSL…	Sgl-FCAP-1	MTISWVSFLCLGLLYIRNCECTIIEEGDKIRSFDPSEDSQLLELLMGWTLTTPAPLSMTTLPPLDNLGGTIVHKGYREAGDNLEDIFQQEPEPLNRETENNSQQDSLDFIQEISPSENKIDEIFDDKDFSSDNEKRAISSLGGFSLHGYKRGLNSLGGLNLHNFAKRRLSSLGGMSLHNLKRGLSNLGGMSLHSYYKRGLNSLGGFGLHNYKRALSSLGGFSLHGYKRGLSSLGGMSLHGGFNKRALSNLGGMSLHGDFKKRGLSSLGGMSLHGGFSKRGLSSLGGMSLHGGFSKRGLNSLGGFSLHGYKRGLSSLGGMNLYNYKRDISDLDGNILPGLQNSKRESMETMPENVESKHKRSVNSDSNTKHKNV*	Obi-FCAP-1	MRLWQFLAVFLGSSFVLSTPQHESPDKKASDEKRQSMGKGPTEGMKNDEFGVAYLNSHSKHMNKRLSDSVKYSPIGMHVLHRKRSFDTLGGAFMPPGGKRNFDSLGGAFMPPGGKRNFDSLGGAFMPPGGKRNFDSLGGAFMPPGGKRNFDSLGGAFMPPGGKRNFDSLGGAFMPPGGKRNFDSLGGAFMPGGKRNFDSLGGAFMPGGKRTFDSLGGGILPIEGSIDLTSGCLGKHSCHSLSGRHVSDGSSVDSSDDSDGKRSFDSLGGAFMPRGKRNFDSLGGAFMPVGKKNFDSLGGAFMPGGKRTFDSLGGAFMPGGKRNFDSLGGAFMPGGKRNFDSLGGAFMPGGKRTFDSLGGAFMPGGKRTFDSLGGAFMPGGKRTFDSLGGAFMPGGKRTF…
FCAP-2	Hla-FCAP-2	MNSTEEDGESHEVSKRSLDSVGSGFIKRKWNPDIGKRPIDQIGAGLIKRTMEQDEEEKRDLDYLGLGLLKRQEDYEEEKRNLDRVGMGLIKRPIDRLGSGFIKKRPLDYLGSGLIRKRFYDPFEDSLKKRPIDRIGSGLIKKRAIDELGMGLLKRPVESVGSGFIKKRPINLIGSGFIKKRTLDSIGSGFIRKRPIDXLGSGFIRKRPIDSLGSGFIRKRPIDSLGSGFIKKRPIDSIGSGFIRKRSIDSNDTELISRDASK*	FCAP-2	MAPFEFFVVVFMCGFAYSRAQHAADIRQDEILYESELPRILNLNEISPGPQSTDEPEDSEDQISDLDQLLRSQVLDNAEDEFEDNNITPSRLSNGQRKYKNLDFLKTLYARKMDTNEATRLLDSLGGYDDRSFKRNTNGQFPFDLDPHNDLRYRFFMKQQLKNLLNQVAENDVNRRVKRASGVDGSNNSALMASNSMTTAIKVAQRKHELKRNFLNSLGGPQMQGWNRHVRKRALDTIGGFVVHGWKRSVDSFKGNNGKGYSHPEGGFPVRGWENHQNNTRSKIQGADLLEGGYLPFSEEDNTSRDNVGLHGESGFRVGSLDVSTWNQVGDGHRDNMATDEKRALDSLGGFNVHG	Aca-FCAP-2	-	Lgi-FCAP-2	-	Ctr-FCAP-2	GLVKRPIDHIGAGLVKRPIDHIGAGLVKKGIDSIGAGLIKREDYREAMDMIKSGLEALEEDLEKRSLDSVGMGLIRRSIHNALESDNDVDLDLIKRGLDRLGSGLIKRGLDTVGMGLIKRGIDQVGAGLIKRNSDKRLDTVGMGLIKKGLDHVGAGLVKKGLDTVGMGLIKRGLDRLGSGLIKKSIDRIGAGLIKKGIDHIGAGLIKKDSDLAMDKKALDYIGAGLIKRDQDSDKNEDVVNVMDDEKRGLDYVGSGLIKKDDNNNDDGKRALDYIGAGLIKRDAETAESESA*	Bgl-FCAP-2	-	-	-	-	-	Obi-FCAP-2	YQKNLDSVGSGLIRXNFDTIGSGLIKKNLDSVGSGLIRRNLDSVGSGLIKKNLDSVGSGLIRRNFDTIGSGLIKKNLDSVGSGLIRRNLDSVGSGLIKKNLDSVGSGLIRRNFDTVGSGLIKKNLDSVGSGLIRRNLDSVGSGLIRRNLDSVGSGLIRRNLDSVGSGLIRRNLDSVGSGLIKKNLDSVGSGLIRRNFDTVGSGLIRKNLDSV
Ffamide-1	Hla-Ffamide-1	MTTRCSSVIITSVVYQQMNCKIPCLLLVLTFCILSFTHAQANPRNLNRLVGQQPLLFGRRGVNPNMNSLFFGKRAPNLNNMDVRTMCNAVLSACAAWQADMADN*	Ffamide-1	MKSSLLFVVISMVAALLVTKSHVTAQRNIKDYVGQQPLLFGRRGLNPNRNHLFFGKRGAINSEVSLKELKSACAMILPYLEDVDSTVDEEV	Aca-Ffamide-1	MKVSLFVLLLSLLCGVMVTCQGHVTTRDIKGLVDQQPPLLFGRRNLNPNMNSLFFGKRGEYNPQKSSLFFGKRSSSVPPMSAGEIKSACAMLVTYLDEVEGLIAAEEGDK*	Lgi-Ffamide-1	MVAKGTVGILIVLFNTICANIDLNYNQVPVANPLLFGRRGINPDMSSLFFGKRSGNSDHRDLRKMKDTCKAVLSSCKILFSDYEDDTVRNKVQDGFGRFK	Ctr-Ffamide-1	MSARLVCVILALCLCLTASHTQGTARRSSLNRLVGQQPLLFGRRGINPNMNSLFFGKRAGLTGPQPSVEDIRSACTMLMTAYEQVAVVDDNES*	Bgl-Ffamide-1	MKSSLVVLCLTTIIALWSLSECRVDSKDMIQQPLLFGRRGVNPNLNSLFFGKRSSGMEQLVSIREIKHACSVLNSYFDNMESLIGEDESQM*	Cgi-Ffamide-1	MKIYSIIPIVIALVAVIVLKTSASKENSRGLTRLVGQQPLLFGRRGMNPNMNSLFFGKRAVDRSTLDDIIVEKCSRIMAACQEYAHERMGEDDI	Sgl-Ffamide-1	MRTYTIISIIIALGAITILKSASSKENSRGLTRLVGQQPLLFGRRGMNPNMNSLFFGKRAVDRATLDDIIVDKCTRIMTACQEYAHERMGEDDI*	Obi-Ffamide-1	MSRGLVLCVATLLSLALWQMQIFHAEAAYTPVYDQQAPLKFGRRGLNPNVNSLFFGKRGAMAEELSHIDLGRRCMAAMSVCNIFFESKSESKR*
Ffamide-2	-	-	Ffamide-2	MRSCCGCDTSEGPGTFRILYCRMKITIMLVIAVTMVTIVGAKYHYRETSREVRNQMMGQQPLFFGRRGPNPTTNSLLFGKRRGSGVSLSVLGRPHTWFFPTPYSGQAYRP	Aca-Ffamide-2	-	Lgi-Ffamide-2	-	Ctr-Ffamide-2	-	Bgl-Ffamide-2	-	-	-	-	-	Obi-Ffamide-2	-
FMRFamide	Hla-FMRFamide	MVMTGSLSGPPQNEEKRFLRFGRTLAGDSFLRFGRQFYRIGKDGDDMEKRFLRFGRSDSDLDDVIRASLLAYSLDDSPNNRRRRSVATAPVETKAVEAGNKDIEKRDADELTSEDKRFMRFGRSGEDEKRFMRFGKSGEEEKRFMRFGKSGDAEKRFMRFGRAGEEEKRFMRFGRDGEDEKRFMRFGKSGEEEKRFMRFGRAGEDGEEIEDEDEGIEADKRFMRFGRDGEDEKRFMRFGKSGEDEKRFMRFGKRFMRFGRDGQDKRFMRFGKRFMRFGKRDSGEGSTEKAETAES*	FMRFamide	MYHKVIEAVVSLTLVALCLGTEDNGEAHILDDDSEFYRFRRSLLQHFDADDEPYTGQNWLSHPRESLSPDLEDSALLRDRREFYRFGRNQLPLEEKRFLRFGRSVHATDSNMGDHTESIRPVYRKRRELGDDSQSEELLHLSKRSVQSNVARGDQKNSEANKNIQKRHTRPGNAKLDNQISENLEPEKRFMRFGKRFMRFGRGDEETGDYEKRFMRFGRDHEDDSDYEKRFMRFGKRFDDDEDVNKRFMRFGKRFMRFGRGNEDEEHNTKRFMRFGKNVDYNEDPEKRFMRFGKSGDYIQDPEKRFMRFGKSIDYIEDPEKRFMRFGKRFMRFGKRFMRFGRQGLENDNQLPNAYSNDIDVGHLEKRSR	Aca-FMRFamide	MRPWCQLALLACLSLKWLTSHVTAESFLCDDSELCENGYLRFGRSMSVEEPHFRLERRSYPPVVYHKRFL RFGRSQEPDIEDYARAIALIESEEPLYRKRRSADADGQSEKVLHRARREAESEHKSLEEVSPDTKQDVEK RDADDVLDAEKRFMRFGKRFMRFGRGSSDDDESGDDDVQDLTDIGDGLGGEGEVNKRFMRFGKRFMRFGK REDGEPDKRFMRFGKSMADNDLDKRFMRFGKRFMRFGKSLPDSEVDKRFMRFGKSVDGDVDKRFMRFGKS VDGDVDKRFMRFGKSVDGDVDKRFMRFGKSVDGDVDKRFMRFGKSVDGDVDKRFMRFGKSVDDDVDKRFM RFGKSVDGDVDKRFMRFGKSVDDAVDKRFMRFGKSVDSDLDKRF…	Lgi-FMRFamide	MKSWSSVGLGLVLTLKWLCTISLADALDCSLSENGRGLCDLMGDGGSADKRFLRFGRALAGDGFLRFGRQFYRIGRSPTFEDKRFLARFGRAGVDESLSDLASAFRPVMQYGPYKNDILYRKRRSAETSVAPKDAESSENSEIMKRDATDPQAEKRFMRFGKRKRFMRFGKRFMRFGKRDGEEEKRFMRFGRDPDKRFMRFGKSIDNNKRFMRFGRDGEDEKRFMRFGKSVETQSLDDEDVDNIDSYDKRFMRFGKRFMRFGRDIDDPEYEPEEQKRFMRFGKRFMRFGKRDGEEEKRFMRFGKREGEQEKRFMRFGKRDGEQEKRFMRFGKRDQTVEKEDKTATA	Ctr-FMRFamide	PANMELCYSTGTMPKRFLRFGRALTDDPFLRFGRNSMVDKRFLRFGRSDVDSMNVEAMLKLALARAQAEAQSPVYLRKKRSAPVEPSDTKQENQAASPNHPEGVAKRDTEGGAPLLEEDKRFMRFGRGVEGDESVTPEEKRFMRFGK	Bgl-FMRFamide	MRTWSHTAILACLTIKWLTIAVAQTVICDDQDLCGVNKRFLRFGRAFDSNADDGFFGYRKQFYRIGRGSFQPYQDKRFLRFGRSDQPDVDDYIRAVLLERQSEEPTYRKRRSPELDEQSDEFAHRMRRSADKAAPAEKDVEKREAETDDAEAEKRFMRFGKRFMRFGRELGYGDKRFIRFGKRFMRFGRDPQDDAEDDTYDADGDFDSDDELAKRFMRFGKRFMRFGKREDAEKRFMRFGKSDEDKRFMRFGKSDSSDDMEKRFMRFGKRESRSVNQESSNSASSGTASHTS*	Cgi-FMRFamide	MGTWTYLCLLVAFLLNWFTIETSANDLIDDCYRNPELCQEVGILFGQQQPVDKRFLRFGKRALSGDHYIRFGRNSDDKRFLRFGKRGEQGSVEDDLREALNKVIKFKQETGLHLRKRRSADPPLVKDVPEDKDSNSTEKEDSASEKHKRETDEVSEENKRFMRFGRTPAEDDPTYMKRFMRFGRNPDLEKKFMRFGKDGNEKRFMRFGKREDNDNMVTDDKRFMRFGRDPKDDTLMERFVRNGRSGDDKRFMRFGSTAKKIISR	Sgl-FMRFamide	MGTWSYAGLLVAFLLNWFTTETSAITGCEYFPELCDQDIDVYLGEPRAPEKRFLRFGKRALSGDHYIRFGRNSDDKRFLRFGKRSQESSVENDLRAALNKVLQFKQETGFQIRKKRSADPPLIKDVPEPKDNDNSTEKEESEKHKREAGEVSQDKRFMRFGRTPSADSNQDSIYMKRFMRFGRNPGFDKKFMRFGKDGNEKRFMRFGKREDGDMVTDDKRFMRFGRDPKDDTLMERFVRNGRSGDDKRFMRFGKREDDEKRFMRFGKSGDEEKRFMRFGKSGDEEKRFMRFGKSVDDEMQNDEKRFMRFGRNKFDDEKRFMRFGKSGDEEKRFMRFGKSGDEEKRFMRFGKSGDDEKRF	Obi-FMRFamide	MSGLSPFSLLIFIFIYCLTVYAATAMSLAQACMESPSMCESISLSHLSSEEGLKSKRFLRPGRALSGDAFLRFGKNGLNLPFEDKRFLRFGRNDRQFEDMLKEVLQRAETVDNRQKRSTDNIPQSSVQDDSSKITKRNADASENGMDKRFMKFGKSGDPYVNEWSDKRFMRFGREPDKRFMRFGKSDDKRFMRFGRNPSELEDRIEEGKRFMRFGRGNDEEEKRFMRFGRDPDSKLMGYGNSDEEKRFMRFGRMSDEADAQKRFMRFGRSVDDDKANRLKKSNDQLRTIRTGRSVDDKKVNSANGDAYLRIGQSDE*
FMRFamide-related peptide (FaRP)	Hla-FaRP	MHLPVSSRDACILITMVLTTAHAVPCRGPQCLEDMSVYQDQTDDVLNKILFFLRTVFNNPHNIPDARLSRDMVPRLDIAPSPAHIQRDLLPEKKGRPFSRFLRIGRSSGGHYSLDAEKRNYIRIGKIPSSAFMRLRGRTRQDAVADTLRRLNSNTAIRVG*	-	-	Aca-FMRFamide-related peptide (FaRP)		Lgi-FMRFamide-related peptide (FaRP)		Ctr-FMRFamide-related peptide (FaRP)	MYRQSPCPHRHHLMLVIIILSSLSLLIPAAAEDVTSTTAESPAANPKQTSTEEEEKGADVKDDVTKRGFDRINGHSSFAKFGKREDGASQLQDQKRRFDRISAATDFGTFGKRKEDSDSEVDKRKFDRIAGASGFGRFGKREQQETDSDEQKRRFDRISGASDFGRFGKREESETLSDMDKRKFDRIAGVSSFGRFGKREEDETAQSDKRRFDRISGASDFGRFGKRADGEEEDTVEDQEDANVNKRTFDRIAGVTNFRRFGKREDREEEEEMDKRRFDRISSATDFGSFGKREEDDEDSMTDKRNFDRIAGISSFGKFGKRQEQDESMDKRRFDRIASASGFAKFGKRQSEQATEGLSIDNDKRKFDRISGLSSFRNFGKRTSDDGLTEDKRFDRING…	Bgl-FMRFamide-related peptide (FaRP)	MPCFIIFFGVCHYVLMSLHNLSTDDYLDSKESSQENVDKRPFDRIGTSSFTSFGKRPFDRIGTSSFTSFGKRPFDRIGTSAFTSFGKRPFDRIGNSAFASFGKRPFDRIGNSAFASFGKRPFDRIGNSAFTSFGKRPFDRIGNSAFTSFGKRPFDRIGNSAFTTFGKRPFDRIGTSVFTSFGKRPFDRIGNSAFTTFGKRPFDRIGSSAFTSFGKRPFDRIGTSAITSFGKRPFDRIGNSAFTTFGKRPFDRIGSSAFTSFGKRPFDRIGTSSFTSFGKREDEEGAENFEVTSVNHLEDAGNAKMKEASNKDNSSLRKKRALESNSKTERKEAAIVKREAEKRTAEGELTLSMVANNADLSGPISKRFSGTFNRFDNEGDDNSNEISSDKLDEFLNKRR…	-	-	-	-	-	-
FxRIamide-1	Hla-FxRIamide	MPSDPFQMYHQASFVKSEHGHLDLTPSSCVLSCSSLSARRTMRENIAQVLALVVAALVPMLMLVNTVQAAPTECADGLCDDKLSASDGAFSDGTDLDKRMSKFVRIGKGHGSSFVRIGRPHSFVRIGKSTGLDSEYEEPEKRGGSNFLRIGKGMNRFLRIGKSVDTDKRASRFLRIGKSMEDDDEEMDKRGHAFVRIGKIPSSAFVRIGREPLLDRIMKKPSSSFLRIGRMGQSSFVRIGKKSSGSDEDTYSV*	FxRIamide	GRGPSSFVRIGKSLYDADEKRTRGFVRIGKNSDLHTAEFPDNYNELSSEFANSGKDNENGIDLLKRASSFVRIGKSAEADKRSSSFVRIGKSDQDVDGEQKRASSFVRIGKSGLSQDGAVALEKKGSSFVRIGKSLHYGSFALPQSASQLLSRKYSENGNEVDEERPIQLVNRGSGFVRIGKIPSSAFVRIGKNKDLIIDPAEYSRGLRGSQSSFVRIG	Aca-FxRIamide-1	MAAVRPTLSYRAMAIPLLLCVVCFMSFCPSAILAEDDASTVKATSPADVTDSAESREKRASNFVRIGRPSSFVRIGKDVGGDGSFDENDAGQQDYLRDDPYADEMEKKASSFVRIGRGSNLPLHRFIRIGRMSDYGSYVDDHYNRMYGDEPEAEKRKSHFVRIGKRPSSFVRIGRSGDEVYDDASEDQYDNKRASSFVRIGKTPVDQLASLKDAIKRASHFVRIGKAPSNFVRIGRNPSSFVRIGRNPSSFVRIGKSELPDDEDFAEKRASSFVRIGKNIGYDLGSSLGYDDLSPADFNSQDMLKRASSFVRIGKSGDGEDKRASSFVRIGKSGDNSGPHLSVDGTDDGQKRASSFVRIGKSGMDNAADGEGALSSDKRASNFVRIGKALSSPGAPAQP…	Lgi-FxRIamide-1	MECDESSVRRHQPILWSKDSLLSVIDIGQHLHMTTFDEMIQLTRQIMEINLVFSLLLVCSISFVLSHPFTDDSNNDDQDLKSAIQDGDTVPQAVKRPSSFVRIGRNPSSFVRIGKAFGRFIRIGKNDPNKRLSSFVRIGKSDPNKRISSFVRIGKSQEFNQEPEKRQSSFVRIGKSPELNENEIPNKRYSSFVRIGKSMDDGSLENPDKRYSSFVRIGKNIENELTNAGLEKRPSSFVRIGKSYFAEPGDMDAEKRLSNFVRIGKSGLEEPEMEQKRAFVRIGKIPSSAFVRIGRMPLYDAILQKPLGYYNVARRMGKSSFVRIGKRNNEA	Ctr-FxRIamide-1	MNLFIIPAATSLLVLLSSLSRAAPPDVTKPSDADVSRVAEPYDDVSNDSELAKRLSSFVRIGRPSSFVRIGRGSRFVRIGRPGNFVRIGRGYEGDLDDLGYDMDGEDYDGTDKRASRFVRIGKASRFVRIGKAGATEPQSKRMSSFVRIGKADPYGNLNSDDQSKRASSFVRIGRIPSSAFVRIGRDPSDSSAEAAGDFGTFDRIARMGQSSFVRIGKREAEHIVHKEEEQ*	Bgl-FxRIamide-1	MFINIILISVTVLLHGVSGDIAEDNLEDDKRASSFVRIGRPSSFVRIGRGDNVEDLETDPNYVDLEKKASNFVRIGRYPTMSRFIRIGRTPMEGAGSYEDDSSEEEPIGDDGKRASSFVRIGKRKSSFVRIGKSLAEEDSDEDVDKRASSFVRIGKSPSSFVRIGKAPSSFVRIGKSPSSFVRIGKSPSSFVRIGKVPSSFVRIGRSIENDLKSELDDIDEEKKASSFVRIGKSPNEELVDSEEEKKRASSFVRIGKSGLNDQDLFKRVSSFVRIGKSQGEEDKRVSSFVRIGKSGADEVEDEGKRASSFVRIGKSDTPMDKKASSFVRIGKSSTSPAETSSDSANSAISDEDPINIASRSSAFVRIGKIPSSAFVRIGKNTNLLTAPSENWKLGFRRG…	Cgi-FxRIamide-1	MLRPHHVIIVGLFYCYTTNAEINENKLLHPIKTEEGANEILGDKADDKRSRGFFRIGKKSAVENEANDKKFDSKTVKEEDNYIPEKIQLIRVVNSESETPIYVPVEFDPESSDDTADEDEKRASGFFRIGKSAENVDKRKGFFRIGKSVDQNPMNKKASGFFRIGRTPIDKRGKGFFRIGKSLNEMDEKRASGFFRIGKSALNDKRSRGFFRIGRSKGFFRIGKAFPLDGEKRASGFFGLAEIHLKNEEKASKFFRIGKSVNSKEENDKRASGFFRIGKKCSGDSDKAGDNLTEDKSQSNPENEDTSESFNRNSDEPVRRASQFFRIGKSSSNKVTKRSSGVNSSPEQNLNLNKRAFFRIGKVPTSAFMRIGRQHLLQSLVSDPLYRNGRIQQSSFIRI…	Sgl-FxRIamide-1	MLRPGQIIIIGLFYLHNIEAEIDQKNILHPVKTVESATKIQGENPTYSIKASDKRSSGFFRIGKSSSMKEKSDEKPKDDYKLEDDNEVEEVGEYVPIDISLIPFAKSESGARFYVPVEIESPKDDNNPTEEEKRASGFFRIGKSNGNFGEKRNFFRIGKSLDQDTKHKKASGFFRIGRLSQNQNTKDKKASGFFRIGRTPDEVMDKRARGFFRIGKSSNDIDEKRASGFFRIGRSKVNDKRAQGFFRIGKSKGFFRIGKAVPTDGEKRASGFFRIGKDHPTGMNKKASGFFRIGKSVQGQANDKRASGFFRIGKSCSEDSKRAGRFFRIGKSHPDKNEEEKSESQISSMSSTQNPDQQNKEKRAGRFFRIGKRTHGRITKRSSGDDVSAYEQMFPQENK…	Obi-FxRIamide-1	MAGLWRIVLLATITLMYVTSQWVIYVQAEEASSSDELVNSANEAEPEMDSEDDLKRANTFLRIGKANGILRLARSPSSFLRIGRRPPLHFVRIGKAPSSMFLRIGKRVDDSENEDLNDYDADKMSGRDTRASPSSFLRIGKSGNEVEDEIDDTDETVKRVNAFLRIGRQNDPSSFLRIGKSLNNEDLSKDKRTNAFLRIGKIPASSFIRLGRGPFTEDNGINTRGFRGPTRGFLRIGKRAAIPDGSHADYFSDLNVKSQ*
FxRIamide-2	-	-	-	-	Aca-FxRIamide-2	-	Lgi-FxRIamide-2	MDDGSLENPDKRYSSFVRIGKNIENELTNAGLEKRPSSFVRIGKSYFAEPGDMDAEKRLSNFVRIGKSGLEEPEMEQKRAFVRIGKIPSSAFVRIGRMPLYDAILQKPLGYYNVARRMGKSSF	Ctr-FxRIamide-2	MQMFTFLPLLSLFCPLILSACSRAAPTDVTKDDQSDVAGPVGQFDDVSGEGDLAKRLSSFVRIGRPNSFVRIGRGSRFVRIGRPGNFVRIGRGYEGDLDDLGYDTEGDNYNNADKRASRFVRIGKGSRFVRIGKSGQVDPQIKRMSSFVRIGKADPYSDLDSDDLSKRASSFVRIGRIPSSAFVRIGRASSEDSGEAGDFGTFDRIARMGQSSFVRIGKREADPEKLAAQAHNLKQ*	Bgl-FxRIamide-2	-	Cgi-FxRIamide-2	MGGVCNSHAIKRYRKIRLFAGLFRADMETPDSETSITTALERLIKILKMLRPYHVIIVGLFYCYTTNAEINENKLLHPIKTEEGANEILGDKADDKRSRGFFRIGKKSAVENEANDKKFDSKTVKEEDNYIPEKIQLIRVVNSESETPIYVPVEFDPESSDDTADEDEKRASGFFRIGKSAENVDKRKGFFRIGKSVDQNPMNKKASGFFRIGRTPIDKRGKGFFRIGKSLNEMDEKRASGFFRIGKSALNDKRSRGFFRIGRSKGFFRIGKAFPLEGEKRASGFFRIGRNSPEEMRKKASKFFRIGKSVNSKEENDKRASGFFRIGKKCSGDSDKAGDNLTEDKSQSNPENEDTSESFNQNSDEPVRRASQFFRIGKSSSNKVTKRSSGVNSSPEQNL…	-	-	-	-
GGNG-1	Hla-GGNG-1	MNEEQNGDDLHSFQDDIPQRPSAERQSDIDRLNIMLRTLMLQRKLRLAAEGLA	GGNG-1	MELTIGASVTFVSCLYLLVATSPVSGKCHGKWAIHACFGGNGKRADPNMNSDSSAEPSLLHRALISDAERLSRMLQLPLIAADPLAENENTAAAERNLGLSTEEYDYGDITDGSDDRYNSLLPRNVPDVQDLRRYIQALKLQHAMRKKEADIY	Aca-GGNG-1	MELTFGSSFTVALLSCLYISLITCPVVTAKCHGRWAIHACFGGNGKRSDPNMSPSTDELPPTLLRQLLVFRRSTSQQ	Lgi-GGNG-1	MEVRCTTLFAVTSLLYLTISVSLVSGKCSGRWAIHACFGGNGKRSDPSLTDNTENSRQETLLRQILLPQTYEYHKSNDALLQDDDINTYEKSHEESQRMRDLRALNILLKTLMMEQKVRTENSVMA	Ctr-GGNG-1	MMKTDTAQTLCIALTSFVVLSAVFSPTEGKCAGRWAIHACWGGNGKRSDPSLNVAPSPSVLRQLLLRNRPVYAQALDSSEELPAVAPQPADDLGSSYNSDFSDYNVLPASPSVSRLTALLRTLRSLQKENEVLP*	Bgl-GGNG-1	MELTIAANLALVSCIYLTLITSPASGYTWKCKGKWFIHACLGGNGKRSDPSLNTENNIPTSLLLRRVLESDPQQINQLLGERSRPELYEENQLTSLEEPSYRSVAEGEISQSPNGNKVDLETMRRYLEAFRLQRAIRESSEDFQ*	Cgi-GGNG-1	MRNPSSFVLFSATLCVYFTVQISSVSASKCKGPWANHMCFGGNGKRSWSPPVQEPEMNRKDDELGRTMLRNVLLKRLNTYPSMSSYYSDSQSFYPMGSDFTEEGDSMSRENELRQLLKEQILRKEMAALVGDDDVYE	Sgl-GGNG-1	MRNSSSFVLVGATLCVYFSVQLSSVTAAKCKGPWANHMCFGGNGKRSWSPSRQEVDKRADDMGRTLLRSVLLKRLNSFPTEEKYYNDLDSFYPLDSDISDKDDSSIKEQEIREFLQEQLLKREMAALTDEEEYFR	-	-
GGNG-2	-	-	GGNG-2	MELSLGGSLALVLCLYLSVITEPAAAKCRGKWAIHACFGGNGKRSDPSVESGMLHKVLFPSARNLNRIFQSENAARPEEEIPVYEEDGMKDAATDDSYPRQDVIEAPEVRDFRRYLLALKLQQALRSTDQSLV	Aca-GGNG-2	-	Lgi-GGNG-2	-	Ctr-GGNG-2	MKTDISYVMCVALISLFLLSSVVSIAEGKCAGRWAIHACWGGNGKRSGGVPAMDLESSDSASPFQKLLLRRPPADIPAPGSTVFVSLRPQDFLASLPTSASSSLSLSSLLSSSSSSSSRLEKGLSGDKDDVLHPSPSDRLTSLLRMLRRLQQARDTLA*	Bgl-GGNG-2	-	-	-	-	-	-	-
GnRH	Hla-GnRH	MKVQEKYQTYNYEECKEILNSRGDSVSVAGHVFQNVRTIQSRGDSVSVEVTCFRMSVLSSQGVTVSVLLLLLTVHAVAGQNYHFSNGWHAGRKRGGDSTSCVFRKDILMLVNKLIMPDTVDAESDGQLTDKRWK*	GnRH	MVCCKMTYASLLLALLLLALVQTALSQNYHFSNGWYPGKKRSSSSVGGDSGSTNRASTSGYVAFEDPCTLRPEAVMLISRIMQDEVARMQRSCSSEAPSGLTDILENAANKLESEGKW	Aca-GnRH	MACRITSATTTLFSILLLIVIAELCSAQNYHFSNGWYAGKKRSSASLLRPEALGSSSSSSSNSGLDVTDADSSRGGVSSLSGRGFGVGELRLVDSPCSIRLETLALINKLMQEEAARIQRTCVANVPSGLRELLEGAASKLESENKW	Lgi-GnRH	MMPVPLKYFGLALTLALVTELAVGQHYHFSNGWKSGRKRSGGVSNLCEMRPELINYINTLLSEELNRIKNTCNLNTEDKDSDVDFSEGAFSRLQNGLKLAADRKWKK	Ctr-GnRH	MSTSRTIVPSTMVALLAAVILLALLGTVQGQNYHYSNGWHPGKRGNGALNKATFYRSITTENLCRYKPRVLSVINKLIQEEIARMERSCSSEEPINHLKLLMEGSPFHSAEATRQKLEEAVAEDEDEAMNKW*	Bgl-GnRH	MTNSWLSVYFLVVCLALLHMSQAQNYHFSNGWYAGRKRSAPTYPSQSPIFDSETGSSSIDASCNISPESIFLINKILQEEVARIQKVCTSGPSSGLRALLESTDSN*	Cgi-GnRH	MKVSPCTQVIVMVLTLGLLCEVHAQNYHFSNGWQPGKRSYRGCTVRPEIRSILIKIIEDEVERIQKCSHSNIEDVFSLIQEKTGVDAREV	Sgl-GnRH	MKASPCTQVIVIVLIFGFLCEVHAQNYHFSNGWQPGKRSYKPCALRPEIRSILYKIIEVNITFIIGKKYTILIAREV	Obi-GnRH	MSATASTTSSRKMAFFIFSMLLLSLCLQTQAQNYHFSNGWHPGGKRSALSDIQCHFRQQTKALIEKILDEEINRIITTCTGPVNEIADL*
GPA2-1	Hla-GPA2-1	MKVLCILLVVVGAAVCKEVGKVGRREGDYVCPPREASFTYKSFCAWDPCEMFADDPCADVPGAVCKLDVCPNHNCIPMFFVDKQWVECNDFVYKEY*	GPA2-1	MSRSLTCTLLLTLLLFVFLTAVTGYRRTWEAPGCHLVGHTRTVAIPGCVPFEVTTNACRGFCVSYAIPSPHETLTINRKLIITSMAECCGMVDTHDVKVWVACRDGYQQKTFKSALSCACSICRRTL	Aca-GPA2-1	-	Lgi-GPA2-1	MRGWIREKNKLLIIIVLLLTVISTIENTPNFAARIGLVCRKRAYVLNESRPWIDMHGIRHPCVGTFRVWSCWGFCDSFEIGDYKMPFKISKPPVCTYFSRRSRFVRLNCPGPPNPEVEFFDATGCKCRRGNSEFESWENLRG	Ctr-GPA2-1	MAQRYSRVLTMVAALVVCLIVCTRVQRCDASTQASLRGHSWQSPGCHLVGHTRVVKIPDCVPFQVTTNACRGFCISYAIPSPSRTLAYNPNHIITSRAECCGIIDTHDIPVQVRCVDGVKEIVFKSARSCACSICRRE*	Bgl-GPA2-1	MTSSFSNVFRRSSSCYINIALLVLFAVTVTSGERGRHSWEAPGCHLVGHTRTVSIPGCVPFEVTTNACRGFCVSYAIPSPPQTLAFNPNFLITSRAECCGFVDTHDVNVWVACVDGYQQKTFKSARSCACSICRRE*	Cgi-GPA2-1		Sgl-GPA2-1	SVIYILLFQKTAMGTPLILVLAMISGLHAVNLDSVTSCLVREYNLFAQKPHITPLGEVLECSGYITVNSCWGRCDSSEIADYK	Obi-GPA2-1	-
GPA2-1	Hla-GPA2-1	MNPWTACLLLVVAVLSLLSHIQARHAYENPGCFKMGHTRTVHIPGCVAFQVPTNACRGFCTSYAVPSPSQTLNSNPNHLITSRAECCSIVDTHDVKMRVRCIDGFREVVFKSARTCACSICRRS*	GPA2-1	MSTTMAVILASPSIIFIVVAFLSASAAQQMWEAPGCHLIGHTRTVTIAGCVPFEVTTNACRGFCVSYAVPSSSDPVVPNNNFIITSKAQCCGIADTHEVKVWVACRNGFQQKTFKSALSCACSICRRNH	Aca-GPA2-1	-	Lgi-GPA2-1	MRGWIREKNKLLIIIVLLLTVISTIENTPNYAARIGLVCRKRAYVLNESRPWIDMHGIRHPCVGTFRVWSCWGFCDSSEIGDYKMPYKISKHPVCTYSSRRSRIVRLNCPGHPNPEVELFDATGCKCRRCNSEFESCENLSG	Ctr-GPA2-1	-	Bgl-GPA2-1	-	-	-	-	-	Obi-GPA2-1	-
GPB5-1	Hla-GPB5-1	MKVLCILLVVVGAAVCKEVGKVARRDGNYVCPPLEKSFTYKSFCVWDPCEIFADEPCADVPGAVCKLDVCPNRNCIPMFFVDKQWVECNDVVYREY*	GPB5-1	MNITPRLHDLPLPCPSAAVIVVVVMVVSLLTTPASLIDPSTTLNCHMRKYQMQVTKPTVYDKDGRMVQCSGWVTVNSCWGRCDSSEIGDYLMPYRISHHPVCTYTGRVSRVATVTGCSDYPDPTEIVFDATGCECRLCNSDYTSCENLNG	Aca-GPB5-1	MSCLLARPSSCHLVDPRTTLSCHVRSYQFRVTKPPVISEDGQILRCSGIVTVNSCWGRCDSSEIGDYLMPYRISHHPVCTYTGRVPRQVTLSGCEDYPDPTFEVFDAAGCECRLCDSDYTSCENLNG	Lgi-GPB5-1	-	Ctr-GPB5-1	MDKLIRLMTQRYLTVVLLVVCLGLTPTPTPTTTASLINPRTTLQCHVRSYSFRATKPPIVNENGDLVTCEGDVHVNSCWGRCDSSEIGDFKMPFKVSH	Bgl-GPB5-1	MSIVSRLTNLPQSCPPPCVLATIVLLLGLLMTPVHLIDPQTTLSCHLRRYQFRVTKPPIYVSDGSIVHCTGVVTVNSCWGRCDSSEVGDYVMPFKISHHPVCSYTGRDRKRVTLSDCEGYPDPTVEVFDASGCECKLCDSDYTSCENLNG*	Cgi-GPB5-1	MWKRCVWLVVLAAFSAVCAVDLDSVTACLVREYNLFAQKPHVTPTGDVLECSGFVKVNSCWGRCDSSEIADYKIPFKISNHPVCTYSRVQKRRVRLPNCHPEHPDPYYVVYDALACSCRYCNSKYTSCETLNG	Sgl-GPB5-1	MLMCLFEEERGALGRRHMKTAMGTPLILVLAMISGLHAVNLDSVTSCLVREYNLFAQKPHITPLGEVLECSGYITVNSCWGRCDSSEIADYK	Obi-GPB5-1	-
GPB5-2	Hla-GPB5-2	MSHPMPQLPALSSLVLLLLTLCIVTLATSEVINPRTTISCHVRQYTMRVSKPYTTEAGDVIPCEGFVTVNSCWGRCDSSEVSVTSLPSSPEGLIIYYRH*	-	-	Aca-GPB5-2	-	Lgi-GPB5-2	-	Ctr-GPB5-2	-	Bgl-GPB5-2	-	-	-	-	-	Obi-GPB5-2	-
Insulin-like peptide-1	Hla-Insulin-like peptide-1	MMLRVHLWSICLLLGLMCGARPVYAGTTRTCFLQDRTPHPRGICDNVPEVMTKICSLYPRNARSVDVDSGQEQVKYRTSKKSALSYLSKRTGSQGFICECCWNQCSPRELMEYCGQ*	Insulin-like peptide-1	MVRNVEYYTTLTVALIAINLAIHQVQGQRRTCSLVARPHPNGYCGERLAQAHSNICFLLRRTYPHLFPMSKRSVPNESHISQSLDSLPDWELDGDESTRYPDSKSDFPPTLEDNSYLLSLLDTSDELADTSDEQADTSDEQADTSDEQADTSDEQADTSERPTASAFINFLEKRNSRRKRSLVCECCYAPCSFRIIARYC	Aca-Insulin-like peptide-1	MSKFLLQSHSANACLLTLLLTLASNLDISLANFEHSCNGYMRPHPRGLCGEDLHVIISNLCSSLGGNRRF LAKYMVKRDTENVNDKLRGILLNKKEAFSYLTKREASGSITCECCFNQCRIFELAQYCRLPDHFFSRISR TGRSNSGHAQLEDNFS	Lgi-Insulin-like peptide-1	MEVTCKCPLVLLGVLFLNFGTVLTHLEWTCTLETKRESPRGVCGQRLPEVLSMVCKRYGGYRDTWFRKRN GEGTNSRLGNIILGKRDAFSYLGKRGQSYGEQGITCECCYHSCSFRELRQYCRNSQQRISIKK	Ctr-Insulin-like peptide-1	MTEVTPVVIAMLCMLGQVTGLRNSCGVDSRPHVKGICGDALLRARENLCFILYTEYPEHFGRSMNKRSVTDIDQYPVHAFANMNLPARDAEKERSGTPATAENVRKLYVSLFPKVQTLLPEMDRSLLPQAPGSQQAKRGGELAQNVQKRGMVCDCCFNQCLPSVLARYC*	Bgl-Insulin-like peptide-1	MAYVSRLLLLLTLAHSTSVTVAEYDHTCNVLSRPHRNGRCGRLLVDTVNLLCNSFSGLLVKRDTTERVNENLKHILLNKKEALSYLTKRETRGSIVCECCYHTCTISELLKYCSYDVYNSKHAAAYRSSHQGQ*	Cgi-Insulin-like peptide-1	MKWLLSVTLVSCLRVGVGSQLQACGSALTDILSLVCRNQFHAPAKRIDAPMVNDIDELARYKRSRQFAVAQKRGGVVEECCFSSCSYENLLLYCSQSVDPLDVFTAARVGSSSTTTQRPITTTSTPTATTTPLSVLTVTGHKPEDQAELDEKAAAAAAWALSRRWFYVNRLGRFRGQVGRRIINM	Sgl-Insulin-like peptide-1	KCVTSLNATWNYKHAKFGWTMKLLVAVLFAIFLQLGAGNELQACGSALTDILSLVCRNQFHDAAKRQYLTEREGKGSRVKRRFSAEQKRGGVVEECCFSSCSYENLLLYCSQSIDPIDVFAAARAETTTTRRPTTTRITTTAAAAQTTTTVGDKPTTPGDDDNKIVDN	Obi-Insulin-like peptide-1	MATKIFPFCARFSAGSMKSCNMCTTWTMLLALLISLLNWQLVIAGLEHTCNEETIRQGAASGGYCGDKIPNFLRLICSPGGYSDGPRQRRNYVSPYASRGLRHRSSTLKDIIISKKKAKSYLVKRDRNWSGIVCECCYNTCTIEELLDYCKDPRDFRARVQQS*
Insulin-like peptide-2	Hla-Insulin-like peptide-2	MEGLKTGRCPLVFLGVLFLHVGWVLGDWEHSCSLETKREGPQGICGSRLPDVLELVCRVYGGYTEKWFRKRSDEDSKNRIKDIILGKRDALSYLSKRSTSSFGEQGITCECCYHRCSYSELRQYCKLSQLTGGRRPLHLGRK*	Insulin-like peptide-2	MVRNVEYYTTLTVALIAINLAIHQVQGQRRTCSLVARPHPNGYCGERLAQAHSNICFLLRRTYPHLFPMSKRSVPNESHISQSLDSLPDWELDGDESTRYPDSKSDFPPTLEDNSYLLSLLDTSDELADTSDEQADTSDEQADTSDEQADTSERPTASAFINFLEKRNSRRKRSLVCECCYAPCSFRIIARYC	Aca-Insulin-like peptide-2	-	Lgi-Insulin-like peptide-2	-	Ctr-Insulin-like peptide-2	MREVRSVLVALLCMLSQVTGMPEYTCGVDARPHLEGLCGPRLTRARDNLCFLLTADFPEYFGKRSVKDFFNRPVKDFVDMGILADEMTEAPMDQKESKLYNSWSAVRSLSKRIEPMSHIQKRGMVCDCCYNKCLPSVLAQYC*	Bgl-Insulin-like peptide-2	MFSTCVLAYLVLSWHIGTSSASVAEEQAFYTMARNRFATANRDDLLYIWHHDCHRRCFYQIEEHFEISCAYDPYIARPRRSVPEIANTTTRLTANKQPKKEPSINGNELETRENSARFPFLSKRDAKSFLRSKRAADQPLSRGKRGIMHECCFTKACSWEEYAEYCHRNPRTTTAMENNCSYS*	Cgi-Insulin-like peptide-2	MLMPFCIDASKSLNKFCYAYNNAGYKKTLIRRMTSETTWFIISLCLLQMVCPVLSGFEKVCTFETYRRGVHQQGACGDNLADMLRLVCRKYKRSGGTRPDVLKRANFTAGGLSPPQIQARSAPWKSVLKRMMVSKEKALAFIANNLDFHRRKKKGSPYNLDKRYGDINIVCECCYHSCSVAEFEDYCAE	Sgl-Insulin-like peptide-2	MPEGHLWSTVLVSFLYVLSPVLSQYDKVCTYETYRRGVHPQGACGDKLADIVKLVCRNNSSRERKDKIVRRNMIKQNFTTSENVFPLEGLRHLGMIKPHHPSLSSRRSPWKSFIKKFLSNKEKALAFLSGDLDATHVMKRAIHFPYKKRNGDTNIVCECCYHSCTVEEFEGYCA*	-	-
Insulin-like peptide-3	Hla-Insulin-like peptide-3	MSLPKVRKVAFGLKSLHSTICISSFTVLVLICVAKISPAFAEDDMMVRAFAERFRSLSGEELYDLWHTDCHRRCRAQLIEHINLACSYDPYKIISKRSVNSTVVRKHVSDHDGDSEKKASIFITRHASAAFLATGHKTKNVGHKIVKRGIMEECCYMKACSWEEYGEFCHTHNRQTTDRVTRCNK*	Insulin-like peptide-3	MSNLISYMLSRACLFTLILTIVPHTGVTPVSAQKYCDHNSVPHPRGYCGVNLSNMVELVCESFKRPTSSRYIVKRQTDKILNDNLGSIALNKKDALSYLAKRATTGTITCECCYHACTFFELAQYCPLPGR	Aca-Insulin-like peptide-3	-	Lgi-Insulin-like peptide-3	-	Ctr-Insulin-like peptide-3	MAVTWQTYPVLLVLGGLLALHVCAVYGSYEHTCTLSTRSRGAHRNGICGDNLARIVSLLCSPRGYVSNWFNKRSAPNRPDDSSVEHNLRGILLNKKEALSYLHKRVPRGTRGRSYGSQGITCECCYNRCTYYELLQYCN*	Bgl-Insulin-like peptide-3	MLLTTAMLVLVLKVSGVHGVATKVCTSTDRSNSRGLCTGHLYSTIMLACDIFRPVNKRDVMTDPVNTMDDIVLAKPNALSFLTKKQSSFTVICECCFNQCTVSEMLDYCSLFGRGKKI*	Cgi-Insulin-like peptide-3	-	-	-	-	-
Insulin-like peptide-4	Hla-Insulin-like peptide-4	MVMRCPTLLLLLLCLQPVPTVADFEKTCNLEDRLEGPAAGGICGSRLPEVIRLTCLVRRHRRSTKAIKGKTIGKQSELKDLTLHKSTALSYLLKRSYGLGEQGITCECCYNRCSLTELMQYC*	Insulin-like peptide-4	MSGNADHCAALTCILLTFTLAVNQGQGQKRSCDLLSRPHPNGICGSMLAQVHENVCFLMRQAYPHFFPLRKRSPVLGDEDNHGGFLLPPLKNVLVSGDGYRVGPAVVGDTPFSLRRNSNAISPRKTFGLPGDIPQDQSENPIQRVLNKRNARSRSLVCECCYGPCTRRILASYC	Aca-Insulin-like peptide-4	-	Lgi-Insulin-like peptide-4	-	Ctr-Insulin-like peptide-4	MATLGLCSSLLMLLLLALNVLWVQGGYEHTCTLATRRQGSHRAGICGSRLPKVIQQVCRVMGRGYAGATVEGRKRSARLQKLSRTTRDASFDENLRDVLLNKREALSYLKKRSTRLSTRGRLGRFGTQGITCECCYNQCSLSELLQYCN*	Bgl-Insulin-like peptide-4	MNAGIDVCLSFTVVCVTLFVGLSLGQDISACDVSKGTHGRGICGARLARAHANLCFLLRNQFPDVFQRKRSVENSIGDVFSIPLSTLADVDLARDDSNKKTNIPPLMAYTDTNALLSTEPRNFRDLFLTLRYSLDNSRPKRQSDQQPRDIVCECCINNCTARQLATYC*	Cgi-Insulin-like peptide-4	-	-	-	-	-
LASGLVamide	Hla-LASGLVamide	VLQNTRGDTSERSDSASQLLVQRCAFWKRMESDARNTMLWKFFCCLLCSVAIPLSVCTATVADDVKDEGIDAFEEPKDLQKRSTEDDFAKRPFDELASGLIGKRAYTPYRLFRYHTFKRPFDPLASGLIGKRFDPLASGLIGKRPFDRLASGLIGKRAPFDPLANGLIGKRPFDRLASGLIGKRAPFDPLANELIEKRPFDPLASGLIGKRSPLDPLASGLIGKRPFDRLASGLIGKRPFDRLASGLIGKRPFDRLASGLIGKRSFDPLAAGLIGKRRPMDPLASGLIGKRPFDPLASGLIGKRSFDPLASGLIGKRTSDDFEKRPFDPLASGLIGKRDAE*	LASGLVamide	MNTWEYMTKLALLSAMFCLGVSGLSGVSASEASRTLIKRYSARNRHRVRSASNPSNFSKRPFDELASGIFGKRSRDSGSHFVAKRPFDELGNGIVGKRPFDELGNGIVGKRPFDELGNGIVGKRPFDELGNGIVG	Aca-LASGLVamide	MAHHRGHRHILLYVSLALSLGLALAEDATDPSDDTGSFDDVEAVSEEADLDPYSMSQELNKRPNVDPYSYLPSVGKRAFDHYGFTGGLGKRKIDHFGFVGGLGKRQIDPLGFSGGIGKRYDSFAYSAGLGKRGMDSLAFSGGLGKRGMDSLAFSGGLGKRGMDSLAFSGGLGKRGMDSLAFSGGLGKRGMDSLAFSGGLGKRGMDSLAFSGGLGKRGMDSFTFAPGLGKRGMDSLAFAGGLGKRMDGFAFAPGLGKRMDSFAFAPGLGKRGMDSLAFAGGLGKRMDSFAFAPGLGKRMDSFAFAPGLGKRGLDRYGFVGGLGKRGMDHFAFTGGLGKRDSGEASGDLEEGKRGLDAYSFTGALGKRGLDRYGFVGGLGKRGMDDFAFSPGLGKKRMDSF…	Lgi-LASGLVamide	MMYNIVCLAFLCLVTDKYCVCLVRVAKRSIENFDEEDADFIPASYPYITKRLYHGLSFYPFQHKRPFDYLASGLIGKRAYGRFGDYRDFMWKRPFDTLAAGLIGKRSFETTQPKFLSKRSIRGMYLDKLNMQNINEGSMASPVVTKRNIDSLANGLVGKRPMDSLASGLVGKRPMDSLASGLVGKRHMDSLASGLVGKRHMDSLASGLVGKRYMDSLASGLVGKRHMDSLASGLVGKRHMDSLASGLVGKRHMDSLASGLVGKRHMDSLASGLVGKRHMDSLASGLVGKRHMDSLASGLVGKRPFDTLASGLVGKRPFDTLASGLVGKRPFDTLASGLVGKRPFDTLASGLVGKRPFDTLASGLVGKRPFDTLASGLVGKRPFDTLASGLVGKRPFDTL…	Ctr-LASGLVamide	SGLVGKRPFGELASGLVGKRPFGELASGLVGKRPFGELASGLVGKRPFGELASGLVGKRPFDEVATGLVGKRPFGELASGLVGKRPFDEVATGLVGKRPFDDVANGLVGKRPFGEVASGLVGKRPFGELANGLVGKRQFDDLASGLVGKRPFDEVATGLVGKRHFGDLANGLVGKRPFGELASGLVGKRPFDEVATGLVGKRPFGELASGLVGKREDSSN*	Bgl-LASGLVamide	-	Cgi-LASGLVamide	MATTKSNAVLFTTIIYVVYTIGPIASQKSFRYDENLYQDQDETLVEKRQFDRLASGLIGKRRLDSVASGLVGKRRLDTIASGLVGKRRLDSIASGLVGKRRLDSIASGLVGKRRLDSIASGLVGKRRLDSIASGLVGKRRLDSIADGLVGKRKMDYHSNTYPDFPAAEKRMMDSLASGLVGKRMMDSLASGLVGKRTMDSLASGLVGKRTLDSLASGLVGERQSFPDFSKGGNEKTENTGQAFGSKTFSEFQLSKRNFLNHLTIKQTFLNFEQYFSFLA	Sgl-LASGLVamide	PHSVLSLILLTLAIFCIDGTTGIVEDEKLSRNMLDRVGSGFIKRESDPKIEELVPRLKYYLAQMASEEDDQNLPEKADKRTFDRLGMGLLKKRRLDRLSMGLLKRDDGASGNYDEDVYADDLGDEDIDKRYFDRLSSGFIKREDPGKRYLDRFNSDFIRRSTFDRLGSGFIKRRFDRLGSGFIKRRFDRLNSGFLKRNFDRLSSGFIKRRGFDRLSSGFIKRQEMDKRRLDRLGSGFL	-	-
LFRFamide-1	Hla-LFRFamide-1	TTVMDSSQILSILMLVFAMVLTGMALGAKEEQDSEAAVAAPSEHHKRSVDFPLSQDLLDDDAYDMDKRGSLFRFGKRGGLFRFGKRGTLFRFGKRGSTLFRFGRGGNDDMWVPVNEDGQDAKRNFHWGRETEE	LFRFamide-1	MVNGSCCTGVALLLAVICSVQSEETIHETGLHSEDDVHSHTAHQAQKRNAFTTPQEEDDGLILTNDGLADPLASNEFLDKRGSLFRFGKRQGSLFRFGKRGSLFRFGKRQGGTLFRFGKRGGSLFRFGRSDSAQNPMDNEEEKRTLFRFGKRSDL	Aca-LFRFamide-1	MEPRPITLSLAVLLAALCTTCATGSAKLVSSSEDNTNSHTDGLTRDHQPQKRSAAAILSPADDALLVRADEGEEEGVGGSYPGIPLSLPGTADKRSTLFRFGKRGAGTLFRFGKRGSLFRFGKRGGALFRFGKRGGALFRFGKRGVASGSGAFPLADDSDVKRTLFRFGKRSNLDLLRDVLSQYQLSAYPDAYPDAYPDAYIDDVDSKRGVDGFHWGDDQ	Lgi-LFRFamide-1	MEFKSIICILVGFLFIATVTCLKSNHLLSDDEPNSIRTVSVLDALGEADDDDVSANDGLLAISEWFPRVVFGPSYKPDKRGSLMRFGKKASMLRFGKRGSLFRFGRNNPLPLYLQAPIRSEREDIPKTKKVPDSFHWGREAE	Ctr-LFRFamide-1	MEMSQVIQMLTVVMTCLLVAAVWCEEQQGSQLEDMAASQPQKRSVGLPADDEAYPAVYTGDDDMDKRSSLFRFGKRGSLFRFGKRGSLFRFGKRGSLFRFGKRGSLFRFGKRADDVADELEMYPDMYVSDDDLKRVVKSFHWGRETEE*	Bgl-LFRFamide-1	MDHSTLALALTFFTAIVCHVYSEEMNHVSALNTLEDHQETHQPQKRSPASSPALYSEDLEADSGLEEPMDDMDKKNTLFRFGKRQGAWFRYGKRAGTLLRFGKRGTLLRFGKRGGSLLRFGRGGNSDADFSEDDKRTLFRFGKRSDLEEIVRDALAREELSNSPWYMENEPVKRGVNGFHWGQESEN*	Cgi-LFRFamide-1	METKTLLIWVFAAFLAFIEVSTASKESKLNHEESEVKSLKRRSNPMDDVTDTYDFSDEDLNELMKRGSLFRFGKRGALFRFGKRSEEDKRGSLFRFGKRMDGYYVSPYASSENFPEKDDKRGSLFRFGKRSSLFRFGRSVDNEKPHTPFRFGREEEDEI	Sgl-LFRFamide-1	METKTLLIWVLAALLALIDVSNGSKESKLSHEESEVKSIKRRSDPMDDITDTYEFSNEDLNELVKKGSLFRFGKRGGLFRFGKRGEEEKRGSLFRFGKRTDGYYVSPYGSSEGIPDRDDKRGSLFRFGKRSSLFRFGRSVDNEKPHMPFRFGREEE	Obi-LFRFamide-1	MQSQAISLLLAVFTLYIIQAYGNEAQKIPTDSARLGSILGLQEEDDNGLEKSSLDDQGLGIDDVDKRNSLFRFGKRSGVFRYGKRTLFRFGKRGKAMRLSRSDSSEEPEDEGLKRTIFRYGKRDGVEDPYEYEDPTLAVAVVPEDKRNNFFRYGRSRTVFRYGRSTEKKKEKRPHTPFRFGREEK*
LFRFamide-2	-	-	LFRFamide-2	MNTMDYTLLTVSLGLLLSVSTCVNSEDLFSDSGSQPADSLNSPPLHTVEKRSPLIHYPDNDDNQDSVIEEPVDEFDSTYYADDADKRGGLFRFGKRQGSLFRFGKRQGSLFRFGKRGSLFRFGKRQGSLFRFGKRGGALFRFGRSGNAQDSENDAELDKRTLFRFGKRSDMLPHLLAQVDLLKNQPYQEHLDN	Aca-LFRFamide-2	-	Lgi-LFRFamide-2	-	Ctr-LFRFamide-2	MELSQVTHAMVVVLFCLLVAAVWCEEQDQGSALDDLAPSQPQKRSIADLPSDDSAYPAVYVDDDDLDKRSSLFRFGKRGSLFRFGKKRSSLFRFGKRSSLFRFGKRGSLFRFGKRDGDLDDEWVMYPDVYIPDDGVKRTVKSFHWGRQTEE*	Bgl-LFRFamide-2	-	-	-	-	-	-	-
LFRYamide	-	-	-	-	Aca-LFRYamide	-	Lgi-LFRYamide	MPTKIAIISVCLVIAVVLDDVACRYLECPDGCFTTTDSPCVCPFSSLDKRGVRLPFRYGKRNSFLRYGKRNNFFRYGKRGSIFRYGKRDEDSLSDSSVESNNPYNILQSDYSTQ	Ctr-LFRYamide	MKTSAILCYTVVLVCVLSGPVVALYSGIDCLSDCLQYGASLFCYCSDLDLQDLSSADSVKRGGAFPFRYGKRDLGKRQIPFRYGKRSVLNVKRPKIPFRYGKRSVSNSAAAPLAYNPQRASAYNHMSSMMAEEK*	Bgl-LFRYamide	-	Cg-LFRYamide	MSAQRNLLLAVVGLCFCFQLLPVKALNCNDICMSGIASDSCNCNVKLPFRWGKRSTLRLPFRFGKRSSSSMESYGDDR	Sgl-LFRYamide	MSPNKSLILAIIGLFSFLQLYPVEAIDCNDICSRGILSTQCNCNVKMPFRWGKRSTLRLPFRFGKRSMVTDSYSNERMARLLYNLANVLA	-	-
LRNFVamide	Hla-LRNFVamide	MPPFQLLVAGLTLLVVSEGQADRDRRDVGDTPDKRLREFFGKRDLSLADSAEGTGQDYGTYDKRVRDFFGKREDKRLREFFGKRSDPSADKRLREFFGKRSGDLSADKRLREFFGKRSDLSADKRLREFFGKRSDVTADKRLREFFGKRDGLEADKRLREFFGKRSDQPEQEKRLREFFGKRNGPEEQKRLREFFGKRDGHLDDKRLREFFGKRGGPMEEKRLREFFGKRNVIEEQKRLREFFGKRSVMPSPAATKRKRDVRKRVREFIGKRSLLSFDDSIGNGYNKRVREFIG*	-	-	Aca-LRNFVamide	MSSQLLICSVFVLFTFGPNSFPSCLAQEQAGNSDATQLSADAKAPESAKDKSGDVQNDGTKSVRSKRDLEIDFGSGDVQKRAREFVGKRAAPPVFQTPLVQDKISGFIPSETESPVIGEFAFPGSVFMDDEEALGAEEEPMDDEDLEFYKRPRQFVGKRGIDDYLLQEKLKDFIEKRPRQFVGKRPRQFVGKRPRQFVGKRPRQFVGKRPRQFVGKRPRQFVGKRPRQFVGKRPRQFVGKRPRQFVGKREADPSFLFEDKRVRDFVGKRSLDFLGGANWYNPYDVTMEPQSEGSDLQGFSKRPRQFVGKRDAFDMFEFSKRPRQFVGKRDQDEMFDFSKRPRQFVGKRDLQEFFDLSKRPRQFVGKREFDDEIDFSKRPRQFVGKRENDDDFDLSKRPR…	Lgi-LRNFVamide	MWSQFLLFLTLTLIIQLKPVIAGDLNDLKETQGDNKNVKTIGVDEEEIKNIKRLRNFVGKREHVNDEDTSFKDRIGRIHSLDLVSSDKRLRNFLGKRSETDSFFQQKRLRNFLGKRLYTSNDKRLRNFVGKREDFTTEDKRLRNFVGKRNDLISEKKRLRNFVGKRDEFTSGEKRLRNFVGKRDEFTSEEKRLRNFVGKRDEFTSEEKRLRNFVGKRSDRDFSEENSLQKVDDNNQKSGQNQEKRLRNFLGKRNVFDVDVKRLRNFLGKRIFTDSSLHKRLRNFVGKRSDDILEKRLRNFLGKRYNVDSSEGPFSYQVKRLRNFLGKRDYFKYGDAVKRLRNFLGKRDNPFKLEYSNFKTGNDLADSFKTSSGAGPVSKRLRNFVGKREYFESKDKRLR…	Ctr-LRNFVamide	-	Bgl-LRNFVamide	-	Cgi-LRNFVamide	MRVPVFLYSFVVFLGVCCVDEVISTDKDIESSSQEIDHQRDFATLNKRRYGDDDFQKRLRYFIGKRSDTGDKEKRIRYLLGKRFAFDGNVNKRLRYFLGKRDFSDTKKRTRYFIEKRSDELGSHDLEQNMRHILEKQESDKVNPGLEKRMRYFLGKRMRYFLGKRANSATSNSDSHNESSKRTRYFLGKRAGTRYFLGKRFRYFLG	Sgl-LRNFVamide	MSFYVFLYILVALLNVCCISKVLSIGQNTDSSSQVSDQETDDTAVTKRRYGDDDFQKRLRYFIGKRADAEDKEEEKRMRYFLGKRFILDSDVNKRLRYFLGKRDSSGEDKRMRYFLGKRQDGAADEDLEKRMRYFLGKRGSGIEIDPALQKRMRYFLGKRTRYFLGKRADDGTQQNTESDDELSKRMRYFLGKRDGTRYFLGKRLRYFLGRLPVSLLSFQNVLLLFPRYLLKLTKQFECLCFVSIFILFPKNYVIIRFCTESELLFHFTFKPNYFVSGIYI	Obi-LRNFVamide-1	MHSYEIILKLSLAVLASSLLVETHDFKSYSNADKRFRTSGDRIKDLLRKRNVNSFMEMETPENYIRELAANRGIEIDYPEQFDKRIRELVGKRYPENFEKRIRELVGKRGTEIDYPDHFDKRIRELVGKRGTEIEYPDHFDKRIRELVGKRGNEMEYSDHFDKRIRELVGKRGAEIEFPDKRIRELIGKRGGEIDYPDKRIRELIGKRGGEVEYPENFEKRIRELIGKRGTEIEFPDKRIRELIGKRGTEVEYPEHFDKRIRELVGKRGNEAENPEHFDKRIRELVGKRSVPSNISKNVVKRNVEKVEG*
						-		-		-							Obi-LRNFVamide-2	MRIYLSVYIVVILSASVWGQVKNGHLIDYNAADSESVKNAVKDTVMKPLVGSSYLNIPSGHTQDNGEVALPDESVMNDPFIAYTDDEDEGLEKRPMEFLGKRPMEFLGKRPMEFLGKRPMEFLGKRPMEFLGKRPMEFLGKRPMEFLGKRPMEFLGKRADDLDDKRRMEFLGKRRMEFLGKRRMEFLGKRPMEFLGKRSMEFLGKRPMEFLGKRGMEFLGKRPMEFLGKRKLDYFDKRPMEFLG*
Luqin	Hla-Luqin	MEDCNELKTLKRRNSSNHSPEPASSSYEIPIEKLETRSDGSVLRLLDRLCTESNVPGFRKCLWNKRK*	Luqin	MKTTHNLMASCCILVVIFSVFSLGQTWRPQGRFGKRLSPDGAVVPDFGLSLSNEIPIEAFFSIKDVSRFKSKPRLCSLSGLQGYPLCDLSLLPTTAETDDWSNVFDA	Aca-Luqin	MTLHLASPFILLFTIAYSLTSAVQGLEPLPAASLSDSPASGADVPPLPSSAATNAAVDKEWLRQKLEEGQFLPQQDKRWGGINSWMTHRLGGPSERDSSQDSLDKQLLVNNVQNYDDSSKRKWSKFSSWGKRDASEETPEGGEGEDGLGAVKKWKNMAVWGKRAEDGLDKRWKQMATWGKREDGDVLGLGTDKRWKQMASWGKRLDDSDRDKKWKQMSVWGKREDNGEPLDKKWKEMSVWGKRDTLDDPEKRWKQMAVWGKRQGLDDRNDKRWKQMATWGKRNSSENYDKRWKQMSVWGKRDGDGDLDKRWKQMSVWGKRDGDGDLDKRWKQMSVWGKRNGDGDLDKRWKQMSVWGKRDGDEDVEKRWKQMSVWGKRDGDADLDKRWKQMSVWGKRDED…	Lgi-Luqin	MKLSEMIMCIMAVLLVTITLGNGAPQWRPQGRFGKRVNPTLSLLLHGDQEKQFLNHEKPFISEDKPYIPEVTDEISVERLTSDARDNLSKFLHRLCSESGLENVPRCSWSRKTSERSSDPIRLI	Ctr-Luqin	-	Bgl-Luqin	MKTSQIILSCCCVLAAVLTVCYSKPQWRPQGRFGKRTDLSSTTDTDKRSPWRPQGRFGKRTLADELSVPFFHTREIPVEILFTTKDLENPAFRPVLCTVTAVSGYPVCETALVETRDTDAILDF*	Cgi-Luqin	MIWVFCTPKEDQKGHLEPGIMLCHLEQLLLSCIVLCLVKVCASLKAQDEASVNDHDIVRRQAMGHSFGDELEGFDLDPKRVNNWNQFPAWGKRLSKRRWSSLGAWGKRSWLDRLISANNNWGKRWKSMSNSWGKRQAPSEFDGLSDDYINIKKRSVDSKFSHNSRNKRSIPTELSPEQNEEKRRWSSLSAWGKRSDDDEKRRWSSLSAWGKRSNPEAIDDNDSDNISKRKWSSFSSWGKRGDPVDLSKRLYSYWQNRLMTNNPWMERRGWNAFSSWGKRSMD	Sgl-Luqin	MHCDLHQLYLSCVILSLVKVCSSLRTKQIETSVTGRDIVKRHAGVSNGYGEELDGYDLDPKRDNYNWDQFPAWGKRQAKRRWSSFGTWGKRGWLDRLISANNNWGKRWKSMSNSWGKRQAPMEYDGLNDEYVNVEKRSVNSKSRNKRSISSDPTSDKTEEKRRWSSLAPWGKRSDDAEKRRWSSLSAWGKRSEPESLNSQDSEEDFTKRKWSSLSAWGKRNNPENLLNSDEITKRKWSSFTSWGKRGLPSDISKRLTTYWRQRLLQDSGPWMERRGWNALTSWGK*	Obi-Luqin-1	-
						-		-		-							Obi-Luqin-2	-
Myomodulin	Hla-Myomodulin	MISDNAIYHAVFDCRRHPGEPVVELCSSSSEEQTQSETQDEPASREKRGLNMLRLGRGLQMLRLGKRGGLNMLRLGRSSPSSEELSDYLYDLLQNEYLVNPEVLNGEDDMMYPDSSRYRRSADGVRAVALPRIGKELEDEEYGDDYEKRALSMLRLGRSGEGLEEETEGLEPEVEEEKRALGMLRLGKRPMNMLRLGKRPMNMLRLGKRPMNMLRLGKRPMNMLRLGKRPMNMLRLGKRPMXMLRLGKRPMNMLRLGKRPVNMLRLGKREDETEGEEKRALGMLRLGKRSDEKVDGDAGVSTQQ*	-	-	Aca-Myomodulin	MQVYMLLPLAVFASLTYQGACEETAAAQTSSDASTSSASSEHAENELSRAKRGSYRMMRLGRGLHMLRLGKRGGPVEPESEENLETLLNLLQGYYSDVPEYPSEFDDTDLAYPYEEYDAPAHPRYRRSTPPTDGVVAPDVLQKGSSEFEDFGDSQLDESDEGYYGYDPENYLYGDFEDYLEPEEGGLGEEKRSLSMLRLGKRGLSMLRLGKREGEEGDEMDKKQDESLNDDFENDDIKRTLSMLRLGKRPMSMLRLGKRPMSMLRLGKRPMSMLRLGKRPMSMLRLGKRPMSMLRLGKRPMSMLRLGKRPMSMLRLGKRPMSMLRLGKRPMSMLRLGKRPMSMLRLGKRDDDEKEKKSLNMSRLGKRSTQ	Lgi-Myomodulin	MFSVNFPLLLVSCLFLADLVYSEEEVSDTKTHDDSLSRTKRAGLNMLRLGRGLQMLRMGKRADFPMLRMGRSEPQYTTDEDDAIRQLIIDILTQQAADRDYFYPESYPYPPPQPRYRRSVSEFPQKEIDMQDLQKITEGGEEEMKQQEAENYPEIEGYPVFADDVEYKNEDEKRPMNMLRLGKRPMNMLRLGKRPMNMLRLGKRPMNMLRLGKRPMNMLRLGKRPMNMLRLGKRPMNMLRLGKRPMNMLRLGKRPMNMLRLGKRPMNMLRLGKRPMNMLRLGKKSDEDHSIETRKINMLRLGRSD	Ctr-Myomodulin	MMKKILLSLTLCFLFQLHRANSEEASAAAETDNDSSSNSGEELSRLKRNAMDMRRLGRGIQMLRLGKRGVPMLRLGRSSPEDTLSLEDLLNAMEESQYLDDFYPYPLPEEPVHGRFRRSADHSQESVPADSVFADGANKSAGDVKRSVDETAEPLEEEESYFNEQGDGDDIEKRPMSMLRLGKRPMSMLRLGKRPMSMLRLGKRPMSMLRLGKRPMSMLRLGKRPMSMLRLGKRPMNMLRLGKRDGEDAEPIDEEEFIEPFEEEGQVEEFPAEKRPMSMLRLGKRPMSMLRLGKRPMSMLRLGKRPMSMLRLGKRPMSMLRLGKRPMSMLRLGKRPMSMLRLGKRPMSMLRLGKRESE*	Bgl-Myomodulin	MFINIILISVTVLLHGVSGDIAEDNLEDDKRASSFVRIGRPSSFVRIGRGDNVEDLETDPNYVDLEKKASNFVRIGRYPTMSRFIRIGRTPMEGAGSYEDDSSEEEPIGDDGKRASSFVRIGKRKSSFVRIGKSLAEEDSDEDVDKRASSFVRIGKSPSSFVRIGKAPSSFVRIGKSPSSFVRIGKSPSSFVRIGKVPSSFVRIGRSIENDLKSELDDIDEEKKASSFVRIGKSPNEELVDSEEEKKRASSFVRIGKSGLNDQDLFKRVSSFVRIGKSQGEEDKRVSSFVRIGKSGADEVEDEGKRASSFVRIGKSDTPMDKKASSFVRIGKSSTSPAETSSDSANSAISDEDPINIASRSSAFVRIGKIPSSAFVRIGKNTNLLTAPSENWKLGFRRG…	Cgi-Myomodulin	MFLSLISGSADSIDESHSRVRRGGLSMLRLGRGLQMLRLGKRGMPMLRLGRSNGLSETDEDFMYPDESELDEGRRQVPLPRYGKDLQQQLQLEWLQSVLDSDLENNGVRIIRPAGRPGRFRRSLKEDNGEEKDSEERHIPHPRIGRLIQLDDLKYPTSNLGSYYLTDSNVYTDKRGMPMLRLGRGMPMLRLGKRLQADDSKRGMPMLRLGKRTNVQADSASQQETNQNKRGMPMLRLGRNAN	Sgl-Myomodulin	MKYSVHLILLLQFLQMVLGSTDSVDETHARVRRGGLSMLRLGRGLQMLRLGKRGMPMLRLGRSYGLSDSDEEDFMYPEETELVDGRRQVPLPRYGKDLQQQLDPNWLERMFNNDMVNSGVRIIRPAGRPGRFRRSLKQDDSAEKDSQERTIPQPRIGRLLPSKFDGYYLTDSEVFTDKRGMPMLRLGRGMPMLRLGKRLQGEDSKRGMPMLRLGKRTNIQEDSASQQDSQTNQNKRGMPMLRLGRNLN*	Obi-Myomodulin	MLFNITPIICVLVLCVLFPRGNCNEDTNPSQSKSKLNENNVAEQHLEKRSSGEYNPHDLKTIVAAILERQEQGQKQSSALRSMNELAGDQYSGDALSRVVQLLRRSMPSEFEEFERRLAPVPRLGRLKKRSVLSNPNKEVDYDENEANDNNESADNILFPRQITLPRYGKDEGSDAADAEQYLSSDCEIYDAYGTCMQYKIPRENVKRQVRMLRLGKRQMHPIKIDDENTGMDKRSDDFNVDGNSGENKRAVSMLRLGRSFNAGGESEENEIPVFDETKRAVSMLRLGRSGPFLDKRALSMLRLGRSEFDQENTALPILYPGQNGFENNKRAVSMLRLGRSMAADDKRAVSMLRLGRSGFDTMKRAVSMLRLGRNSGYPSEKRAVSMLRLGRSGSDEDK…
NdWFamide	Hla-NdWFamide	MMRVALLVCTVLFAIISTSNANWYGKRGEKEDLVGNFLRHRFEGMPLNDAEATLAAIGQLYKDWESRKAAPIAL*	NdWFamide	MSKVAAMVIVLVVVFNCIFSPADANWFGKRGSKDSLYSLLLQQPHLGTSRLDNSLLETPRLETSQLQRSTEAQDEDIDPVQFAIDDLETAAADRWADEDQ	Aca-NdWFamide	MSRALAAVTVVFLLSVVCSPTSANWFGKRGDKDDLFSLLLQQQQQQPTHADSSIVPLASTGAEDAMFAIENIVQAWRQHRSEKLGRSTQG	Lgi-NdWFamide	MKICLTLVVLMAVFVTSDAWWFGKRDLNGDAPPSAVKAALISLCSQYGDNTSSDPMAQDVRNVCQALKEASNNRRTIIS	Ctr-NdWFamide	MVRSSAVLVLLVLAAVVCTSHANWYGKRGDRADFFGLLMQQRLDGLTSRDMNAEVALAAIDQIIQIYRQHRTQSAMELKQGA*	Bgl-NdWFamide	MLSTLARITLTVLLVAVVVLPSHGNFYGKRGDKDDLYSAILQAAESPSRRDLTADFDTESAIESVLRMARQQESKFTETKRG*	-	-	Sgl-NdWFamide	MTRTTSFVSTLTLILAIVLMIEGNWYGKRDDGAENVFLRFLEQSQTPPKQNANSRMRLHLLRKLIGSIKYAESEDDMGATPTYF*	Obi-NdWFamide	-
NKY-1	Hla-NKY-1	MQAYVIVTVLSALLTLCTCRTIDQSQAALSGVSRVKRQTLPDDYDDVDVRMASLYNLLLSRIAELSAREVYPNTFADFKRNSPREINLDNSPITRKRKVFWQPLGYLPASARIGHQGGSSNAAKDKNGSSIFRYGK*	NKY-1	MVWTINTLLKLALLAFVPLCYSRPPLLDGEDDMGYFLDQESPRRLYVPVEVPLDALLAALRAHTQSSHQPNALLDKRASSASEILGSALPKLDDDTDVRGMKRKMFWQPLGYLPASVRAHNSPTGSTGSENQGSSSNVFRYG	Aca-NKY-1	MTSSIYGFITLSVVALISQTTCRSLDLLLDGDFNNGLASFDGSSKWSRLPLEFLAAFDLDPHQAQGQHLAEAPEAPLMEAMKRSRGPSPRRLRSYLRRAAGLRGMKRKMFWQPLGYMPASARAHNNVPEVVNENSQDSGTNVFRYG	Lgi-NKY-1	MDIKIGETFWLWLLLAMFCTVYSRAASEYDLERPANSPYLDPESNIQPSFRYYLSLLSNSKPKFYPVDKILKRKMSWRPLGYLPAAVRMAGNDADKVSQATEDGSQMFRYG	Ctr-NKY-1	MTSPPRRQTFLTLTLITLLLSGALARSLRDENMQNVLRGIMAEDEAEPSEFDTLLHRLLIPVDEYTPRSSAAESVHLKRSWADDDKRVFNVPEPMKRKMFWTPLGHLPASARMGRPQAGLRPHMEVSGSSVFRYG*	Bgl-NKY-1	MASSFLAYNVILFAVCLSFAVATFDIEEDVNDYPDQEKRTYATTDATLETILNVLKSHAQSLRQLESTVYEQKRSGFRSRSGDDLLGGVKRRMVWQPLGYLPASIRVQHGSQGPQRPEMQDTGSSVFRYG*	Cgi-NKY-1	MPRYNNCSYVLCAITTIIFAIIATSESRDLSESDLMNFISTDQDRDFKVLSQLLKAEVLKRKLRDLSLDSNDIDLSDELMNELSSEKRRRQYLPSLLTVRKRKVFWQPMPYVPHNARHNSRDKDAGASNDIPNSAAILRYG	Sgl-NKY-1	MSRYSIYRNVFCFAITICTTIMATSASRSFSKSDFMNFISTIQDPNLKVLSQILKDEAWRRKLNELSSEIDDIDLSEEYLNELSSENQRRGYLPSFMSVRKRKVFWQPMPFVPHDVRQNSRDKDAGTNDSPNSGTILRYG*	Obi-NKY-1	MGINIIHVLCLVAVFASSVHSLPKRNDHVITLRSLRQTGLSDSDSRALLQAYILGKLSNVDIAGNKEADNSDYTTIKRKAFWRPMGYLPFDNHGGSGASSSNDNSPSGGTGSAVFRYG*
NKY-2	-	-	NKY-2	MQPTSCAIVMVTLLSVIAVCFSRPSSLLGEDSVNYRQDQDLYLPASMSCSAILRVLKAHNLHSLDYKTAEKKSAANTKSLDELLPNTDADIRMAGIKRRIFWQPLGYMPAAARANNGPVAVTGSGNQGISSNVFRYG	Aca-NKY-2	-	Lgi-NKY-2	-	Ctr-NKY-2	-	Bgl-NKY-2	-	-	-	-	-	-	-
NPF/NPY-1	-	-	NPF/NPY	MLKFVLILLVVLSVAIMEATCNTQMLSPPERPREFKHPNELRQYLKELNEYYAIMGRPRFGKRNGAVGNFDYLSPNDWEDILSSQ	Aca-NPF/NPY-1	MQRVILVVLLLSCMAVLSVRADNSEMLAPPPRPEEFTSAQQLRQYLAALNEYYSIMGRPRFGKRGDSFRKKKKVTDCAG	Lgi-NPF/NPY-1	MQKLVLSLLILAAVVMLEVTSQDSMLAPPDRPSEFRSPDELRRYLKALNEYYAIVGRPRFGRSVNKRSAADYLFKPSHKNE	Ctr-NPF/NPY-1	-	Bgl-NPF/NPY-1	MQKILFVSLLVLSLAVMEIVCMDNMLTPPERPAEFKNANELRKYLKALNEYYAIVGRPRFGKRNGASILNDLFRQNGDEFADYGANWADI*	Cgi-NPF/NPY-1	MQTSSLLAVLLVTLLSVWTVLGNDSLLPPNRPSRFSSPGQLRQYLKALNDYYAIVGRPRFGKRDSEFSSYGQEPRSDGILSSSRDREDFAGPQWW	Sgl-NPF/NPY-1	MKGIMTTNCVYFVLLVTLVCVYTVLGNDSLLPPSRPSAFRSPAQLRRYLKALNDYYAIVGRPRFGKRSNDYSFTDQDDVDGMGFLYSSRDKPDNSGPQWW*	-	-
NPF/NPY-2	-	-	-	-	Aca-NPF/NPY-2	MQRVILVVLLLSCMAVLSVRADNSEMLAPPPRPEEFTSAQQLRQYLAALNEYYSIMGRPRFGKRGDSFRKREFFRTNGERYPEDAAAWTEFQ	Lgi-NPF/NPY-2	-	Ctr-NPF/NPY-2	-	Bgl-NPF/NPY-2	-	Cgi-NPF/NPY-2	MIQTVTRQIVVLGLLLTVTFSVTFSAPLDPDLESMALVPPSRPSGFQNFQEMQRYLMELNRFYNMMSRPRYGRDVHQRNRQKLKKISNLLHLASLSEM	Sgl-NPF/NPY-2	MITSQTALLFVLVACGFGIVTAAKFETTELLAPPERPTSISSIEELRRYIQELNMYYLILARPRYGRSVSNSKPEKT*	-	-
NPF/NPY-3	-	-	-	-	Aca-NPF/NPY-3	-	Lgi-NPF/NPY-3	-	Ctr-NPF/NPY-3	-	Bgl-NPF/NPY-3	-	Cgi-NPF/NPY-3	MLSSQICLLFIVTASWFCLNTASQLENMEMLAPPERPSSITNIDELRRYIKELNMYYLILARPRYGRSVSNKKPVRSQPQS	-	-	-	-
Pedal peptide-1	Hla-Pedal peptide	MSRKEVKVGKSDDTSVAVKRSFDSINKGSGLSGFMKRGFDKISHSSGFSAFNKRPFDSISGSSAFSDFAKRPFDSIASGGGMAGFAKRPLDSISAGSGLSGFAKRPFDSIAAGSGISGFAKRSFDSINAGSGLSGFAKRPFDKIGDGTGISGFAKRPFDSIASGRGMSGFAKRPFDSIAAGSDLSGFAKRPFDSIASGRGMAGFAKRPFDSISSGGGMAGFAKRPFDSISAGRGMSGFVKKSFDKIAHGGFASFNKKSDSEVEKRPFDSISQGAGMAGFAKRPFDSIGSGGFSTFVKKGLDSISHFSDMDDFGKRSVDNAVESESDERK*	Pedal peptide	MLLLLIVSLLTAQGHCAGNLPKNFQDVEGKTQTDGQRVLTERHNQEHHQSENSSKTPWHVVGSPTGFVHQPDSAAPGPVASAASPIPDSFQSSTSPDVKNSIPHRDLHKSPPTTLTEHGVPARSNPIHHRHENSLHASNNLPQFGNHAMKRNLDSKEVEFSPYVFHSHSNAPDESEKTPELGDDNKNLLAYLSAPMGIYQHHLGKRSFDSIGNGRMSGLNQNYLRKRPFDNISGGSLSGIHQNHLDKRQMNYAASGDSPVLDEALLGDDQTYLDNAIVSELPDLAKRQFDSIGSGSLSGMHQNHLNKRNFDSINRGRLSGLSQNYLGKRNFDSIGGGRLSGLSQNYLGKRNFDSIGSGRMAGLSQNYLGKRNFDSIGSGRMAGFHQNHVAKRHTNIKDQ…	Aca-Pedal peptide-1	MRTAAICVVLLLCTARSQCSDQQSQNEGESQPANEEKRKFDKISSLSGGFGGFGKRDGEGGSTEETGDVEGKNSEQTTEEASEAGDVTDEANSSMAKRGFDSISSVSGFGGFGKKSGEKRRFDSINSSAFSGFGKRPFDGIDSVSAFSQFGKRPFDGIDSVSGFSQFGKRRLDSIAGSSGFSNFGKRRFDSIANNNAFSDFGKRRLDSIAGSSGFSNFGKRRFDSTANNNAFSDFGKRRLDSIAGSSGFSNFGKRRFDSIANNNAFSDFGKRRLDSIAGSSGFSNFGKRRFDSIANNNAFRIWQKAI	Lgi-Pedal peptide-1	SNGKLSGFAKRPFDAISNGKLSGFAKRPFDTISNGKLSGFAKRPFDTISNGKLSGFAKRPFDTISNGKLSGFAKRPFDAISNGKLSGFAKRPFDTISNGKLSAFAKRPFDTISNGRLSAFAKRPFDTISNGRLSAFAKRPFDTISNGRLSAFAKRPFDTISNGRLSAFAKRPFDTISNGRLSAFAKRNFDAIDGGRMGFRGKRAFDKIGSSFSTFSKRDVGDEEDYLEKRPFDAISNGGLSAFAKRPFDAIS	Ctr-Pedal peptide-1	-	Bgl-Pedal peptide-1	MKMLSTVTIYSAIVLFAAVVSIQADEELSSNTNHNEIKRSVGTENEVDLDKRPFDSISGSHGLSGFAKRPFDSISGSHGLSGFAKRPFDSISGSHGLSGFAKRPFDSISGSHGLSGFAKRPFDSISGSHGLSGFAKRPFDSISGSHGLSGFAKRSMDEESLYGAYKESDDDIYRREIEEEDDKLFNVAEEELQTVSENTV*	Cgi-Pedal peptide-1	MFTHHKTLFSLMAVLLLSIAAAKSSPAPTDYNRSDTEDIETKEQRSGEETDESTELFDEKQLGSMGTQEYSKKSMDSINGARGFRGFAKKHYDSIGGSRGLMGFNKKNYDSIGGSRGLQGFNKRYYDSIGGSRGLQGFNKKNYDSIGGSRGLKGFNKRYDSIGGSRGLKGFNKRYDSIGGSRGLQGFNKKNYDSIGGSRGFQGFNKKNYDSISGSRGLKGFNKRYDSIGGSRGLKGFNKKNYDSIGGSRGLQGFNKKNYDSISGSRGLQGFNKKNYDSIGGSRGLQGFNKRYYDSIGGSRGLQGFNKKNYDSIGGSRGLKGFNKRYDSIGGSRGLKGFNKRYDSIGGSRGLQGFNKKNYDSIGGSRGFQGFNKKNYDSISGSRGLKGFNKRYDSIGGSR…	Sgl-Pedal peptide-1	MNFKVSTHEVIFLVLALLLNYAFSQPPPPSSESEQLDKNRDETNEVKQAEQSNNQEEFEEKKFDSIGGSRGMSGFNKKNAHSGKRRQKENTKKSFDSIGGPRGLMGFNKRYYDSIGGSRGLQGFNKKSF	Obi-Pedal peptide-1	MQSMFRIGFMVLLNLFILTRAEEPTRMLLSSERESRPVENEESAPDLKKRYILHSVEYPGLDPEDLIETTSLDKRGFDSIDGTGFRSMGKRPFDSISGSSFSQLGKRKFDSISGGAFSQMGKRPFDSIDGGSFNTMGKRKFDSIASSSFGGMGKRPFDSISDGMFNTMGKRKFDSISDSNFASMGKRQFDAISHSRFYKMGDGAGSRLFRRNFDRISGNEGLSPGFPRLIGSHVKRPFKLYRPSKN*KWTLRLDLEKSKQINKCISKNVKS*
Pedal peptide-2	-	-	-	-	Aca-Pedal peptide-2	-	Lgi-Pedal peptide-2	-	Ctr-Pedal peptide-2	-	Bgl-Pedal peptide-2	MRTELFLLVILPYSLMSAEVPDGDIKKKSQSQVFQYETRPGDPQGSEMNKRSIDSIGSGFIKRPLDSIGSSFIKKGIDSIGSAFIKRPIDSIGSSFVKKNIDSIGSAFIKRPLDSIGSSFIKRRFHHYAFNKRPLDSIGSSFIKRGIDSIGSGFIKRPLDSIGSSFIKRGIDSIGSGFIKRPLDSIGSSFIKRGIDSIGSGFIKRPLDSIGSSFIKRGIDSIGSGFIKRPLDSIGSSFIKRGIDSIGSGFIKRPLDSIGSSFIKRGIDSIGSGFIKRPIDSIGSSFIKRGIDSIGSGFIKRPLDSIGSSFIKRGIDSIGSGFIKRPIDSIGSSFIKKSIDSIGSGFIKRPIDSIGSSFVKKGIDSIGSGFIKRPLDSIGSSFIKKSLNSIGSGFIKRPI…	Cgi-Pedal peptide-2	MWKLSFGAIKMQSLLNVLLVTLTISCCINRATGTADEERSSRHKRMLDRLGSGFIKREPDSKIDDLVPKLRYYLAKAISEQDDDSSPTEVDKRRLDRLDMGFIKKRRLDRLSTGFIKRDDDTEYENENEDGEDQMDKRYLDRLDSGFLKRFVPGEDKRYFDRLGSGFIRRSNFDRIGSGFIKRRFDRLGSGFIKRRFDRLNSGLIKRNLDRLNSGFIKRQRLDRLGSGFIKREEMDKRRLDRLGSGFL	Sgl-Pedal peptide-2	MLLALTGVQSPHSVLSLILLTLAIFCIDGTTGIVEDEKLSRNKRMLDRVGSGFIKRESDPKIEELVPRLKYYLAQMASEEDDQNLPEKADKRTFDRLGMGLLKKRRLDRLSMGLLKRDDGASGNYDEDVYADDLGDEDIDKRYFDRLSSGFIKREDPGKRYLDRLNSDFIRRSTFDRLGSGFIKRRFDRLGSGFIKRRFDRLNSGFLKRNFDRLSSGFIKRRGFDRLSSGFIKRQEMDKRRLDRLGSGFL*	-	-
PKYMDT-1	Hla-PKYMDT	MDVTTTTVLGALLLAVLAVATSSGLPADEGRLDEASLAAEKRPKYMDTRQEDFEMVKQTVLIAMEELVQEGKLNPSVLAGGQVKPVEKRMYMGICMRQSHNHFIPYPCMRSGRK	PKYMDT	MEAKTHQIFAVYILLTTLSVIDGIPTRNILQQETRISLSKRPKYMDTRRDLDILKDLILLSFQELADEESLQSASVSDDDSFATVEKRERYMGICMRKKYNNFIPFPCLRGG	Aca-PKYMDT-1	MELQACNIFALFVVVVTLSVASSLPASRTDDVLQEASGLALNKRPKYMDTRRDLDVFKDLVLISIQELVDENRLNPALLPEEDAPKPVEKRMRYMGICMKKQYNNFIPFPCLRSGR	Lgi-PKYMDT-1	MEMRSSTILSLLVVLLLAAPTFCLPPDQGSEIDDLDKRPKYMDTREELSVLKDMVYIVLQELAEDGKINPELFTIHDQKAVVKRMKYMGICMRRTKYNAVVPYPCLRSGR	Ctr-PKYMDT-1	MEQSMMAMSAVLLAVLVSCASALPTGGSVLQSSGLSAEKRPKYMDTRDLDIFKYMLMASIRDLVDEGQINSAVLGQGSEEDQQSEMKAVAKRMQYMGI	Bgl-PKYMDT-1	MEFPTFPFFVLVLTIVSVSLSNSLPTRTEDVLQEANMALEKRPKYMDTRRELDMFKDLVLMSLQELVDEERVNPTVLLEDESSKTVEKRERYMGICMKKQYNNFVPVPCLRSGR*	Cgi-PKYMDT	MEISMPMLLCSSLVLVLISSVCSVPIDVARETENDHHLEEKRPKYMDTRDLYAFEKLVYLALKGLVEEGKVNPEVMTSEANEGFLDNQGENGESKEKAGPADKRGHLRICVRRSGSRYVPYPCFRS	Sgl-PKYMDT	MEMSMSAMLYSGLVLVLVSSAVSVPIDVARDTESDQHLEDKRPKYMDTRDLDTFQKLVYLALKGLVEEGKLNPDMMATSSESYFDNQAEEESKNKISNEKRGHLRICVRRSGSRFFPYPCFRG	Obi-PKYMDT-1	MDCRLIALVSVCLFLLTSPALSAPAADARSHLEQSKDVPLSKRPKYMDTRDPQDIFKDLVYLTLQQLVSEGKVTPDVMTGADIGVPGKRGHQGLCLRRTASQRFIAYPCWRSGSK*
PKYMDT-2	-	-	-	-	Aca-PKYMDT-2	-	Lgi-PKYMDT-2	-	Ctr-PKYMDT-2	-	Bgl-PKYMDT-2	-	-	-	-	-	Obi-PKYMDT-2	MDCRLIALVSVCLFLLTSPALSAPAADARSHLEQSKDVPLSKRPKYMDTRDPQDIFKDLVYLTLQQLVSEGKVTPDVMTGADIGVPGKRGHQGLCLRRTASQGFIAYPCWRSGSK*
Pleurin	Hla-Pleurin	MKESLVFLVFAVAGSCAGIFWTNSKDNDYPRIGRRSFYTASSENTYPRIGRSGGVEDTFRDGIETRGSFFTQSDENTFPRIGRGNDNSDGNNVNKVEAKLQIEKGSPYPNSNEDTKSLTKAQTGLGTTFSLPAPILFFAWDANGDDSLSRDEFVNGIANSRKRRHLV*	Pleurin	MRQEVLLLMFCMFTTSCCGVFYTSSKANDYPRIGRRSFFTSSKENTYPRMGRSGDDGKVTIDMLKRRFTAGDSASYPRLGRAGYFTKGAASYPRLGRSSNSLDVEDIQDLMPDSDEELPQRNIAHLGLQAPLAFLLWDKNGDGHLSKSEFLTGLSKTRHRPSHKK	Aca-Pleurin	MQSHVSSSLLALCVLTGSACAMFYTKGSDSDYPRIGRRSFYTTGNGNHYPRIGRRDSPGAAAGTDILYPNTASGFSDFSAGAPAVKRGIFTQSAYGSYPRVGRRSQAGDDGSQEGLQTARSKIFQKITGLDGPVEEELGDGSAERLEADNQIGLELMFLAFDLDGDQALSKSEFQSGMEKFRRHNPLC*	Lgi-Pleurin	MRQEVLLLMFCMFTTSCCGVFYTSSKANDYPRIGRRSFFTSSKENTYPRMGRSGDDGKVTIDMLKRRFTA GDSASYPRLGRAGYFTKGAASYPRLGRSSNSLDVEDIQDLMPDSDEELPQRNIAHLGLQAPLAFLLWDKN GDGHLSKSEFLTGLSKTRHRPSHKK	Ctr-Pleurin	SRDNDYPRIGRRAFFTGGGKGSSYPRIGRSSPSTGTGSSTETGKANAGYGDSFHSPSKRGIFTDGEGQFPRVGRRGLAAILSQSPELSAADTLMTSLEIPDVLDTQEDVARTPLRLPLGLLFFSFDTNGDKVLSREEFVEGMSSAREDGTVCR*	Bgl-Pleurin	MASITHMEKMVILLSMFCWTSYAVFYYKHEPDYPRLGKRTSYSDDKLQGEGSNPQLMLPDPAFTNLNRRGIFTQGSAGVPRLGRRNLDTDKRGVFTQANGGYIRMGKRDDPWNDKRGVFTQGQIGSPRIGRQGASDIWSDGVNQVLQKMAEFKEDNDEEKAGQGQMDVGNDVLLQPTSIPYLFIEMDTDNDGKLSKEEFVSGIQILKSQTSYC*	-	-	-	-	-	-
PXFVamide-1	Hla-PXFVamide	MSLLTREEPGSPSVGIQGMCGMISSSFILLLGSVLTFAEDAGADSPPMHDSGLLSPPPPPHSAALQQGDVVNPPPDGLARDAYMLSDDQGLERLLSSDSSNADSSQPYTQLLDDELLQRIKQLVQQEQKRLAWNRRSYAPMFVGKKSAPLFIGKKSAPYFVGKKSAPYFVGKRAVPYFVGKRAVPYFVGKKSAPYFVGKKAAPYFVGKKSAPYFVGKKAAPYFVGKKAAPYFVGKKAAPYFVGKKAAPYFVGKKAVPYFVGKRAVPYFVGKKAAPMFVGKKSVPMFVGKKSAPMFVGKKAAPMFVGKRRLADILDNLSGSNMQELSVSPLARIPSKEDSYRAIPVKRPSDYPQNAENEFLKRNMYPAPYFIGKRYDIPRFIGKRQQETLKDLLSAFHYY…	PXFVamide	MTSFSSSLFGLLIAGQALSICVSQAGSNRTESPWTSPSVGSIEQHELYQQGPGTHETQPASAHYSSYRSKRDSGEADDDIYTYKRLRDFVGKRSHSELYQDFLEAPEDVPPSDNILNALESNNVADQLLIPRADKRLRDFVGKRSMSMNAHLWTPDVKRLRDFVGKRAFHAVKRLRDFVGKRALGFLGKRSHGVYEGDNKNEKRLRDFVGKRTQFEDIISPNEIWDEGNNRFVSHINKRPREFVGKRSGIFTYDNRNKRLRDFVGKRTSHFVMVPSAHFGKRLRDFVGKRVVSDIVNEDKPLLQFVGNSNNDEMHADNKRIREFIGKREVKRPREFVGKRSVSLNGENRIELQKKLRDFVGKRSSDGEFEQSKRLRDFVGKRLFNGEFEEDKRLRDFVG…	Aca-PXFVamide-1	VGAQVFWKRYIDEHHVSKRAAATAFPLIIEARQAPRFFGKREYRYPPRGSPHFIGKRFSLYRSPGKYSLSSPYMSAKEFKETFRRSDPFFMGKRTAELNEEGSDDFTNDDTDDENEYDETVLFKRGAPRFVGKRGAPRFLGRRGAPRFIGRRGAPRFVGKRGPPRFIGKRDLDWYQKALCAEADILELDDCADFLGNDDVKRQAPRFIGRKRGEDVSERDYAQLLEALSRLQAIKQIKAR	Lgi-PXFVamide-1	MKSILVTSVVVVAGTLLTLVQALGADKFAEPATQKHSKIPTAALSHSGDTLLNTDAHQTNPSNIWKSKSKFDLDALPVVNRQDVQSHYAQHRRSYDTPMFLGKRDLKNLSLRFKRATDLEDLDATEFSDDFDKRGVDIPQFIGRRRYDTPQFIGRRGYGVPAFVGKRAFRAPAFIGKKAFGAPAFIGKKAFDAPSFVGKRKLTAPSFIGKRGLDVPAFVGRRAYAPPQFIGRRGMDVPAFVGKREFQTPMFLGKRAFSAPSFVGKRGLDAPTFIGKRKEESFRDLLATLQAYREYRRLMQTDKRFDAPLFVGKRSDYENDNLAAETLSRRFQCIPQWVFRMRLNVVDLNMSFIGGYKQNYFSLNILDDVQTKILLPLDDLHKVDSSKMDVPTVQLWDAD…	Ctr-PXFVamide-1	SVLAHNTGTDANSSQLDSKGHVASSAVTSPSPSGGSNGAADNAESTASAPSNPLPPQHPDLNPPFVISESGESLVPAASSLTYQLPMTVLLARAPLQAPHRPYVTLLGPGDEEYAASLIQEPQANKVQDNEITEHREPEDIEAIDQVGSNDNEVTDDFDQTDDKLSDEEHPNQKLRVKRGGYTAPYFVGKRSLEESEEIEQEELQKRDGDDYGSDEQKEAENQEDDAAEKRASPMFIGKRRTPMFVGKRGPAPMFVGKRRTPMFVGKRRTPMFVGKRGASMFVGKRGPTPMFVGKRRTPMFVGKRRTPMFVGKRGPAPMFVGKRRTPMFVGKRRTPMFVGKRRTPMFVGKRRTPMFVGKRRTPMFVGKRRTPMFVGKREDDDFAGYTLTEGGADPVIDG…	Bgl-PXFVamide-1	MLPQVSTFLTLLAILHLPKSCHSENVSSDPGSGDALQSLDDLRWQSFSSDGNSDVDKRVREFVGKRSEDQFYNENDAIEKRPRQFVGKRSEDKRVREFVGKRVREFVGKRDNGDIDTDKRVREFVGKRNSYGDEFDNADDVDRFLAEKRPRQFVGKRSGPYFYDEIISNEKRPRQFVGKRSSPYFYDEILNNEKRPRQFVGKRDNLEDIFLNEEKRPRQFVGKRYIADEDFLIDAEKRPRQFVGKRYSFALDNLVEKRPRQLVGKRNFDEVLTDAAQRNAITNYILHRLVEESPELMDGVLTEDGQLRTKRSVSDCEDDLKKSLTELFSKDDEDLRDRFSLDKRIREFVGKRSPSSCVDLVKRVREFVGKRAEKRPRQFQGKRSTDSQTKGSR*	-	-	Sgl-PXFVamide-1	MKLTFGTILTLLWAFSSARVNADDDSNKENLLTSALRSLSENRLNSREETLARSPENINGDFQENTENFDPDQLQTQQNLDENCSDSIHSPLEENENEYNEPENRIPIENNMENQRIKKYSEFLGKRFSEFLGKRGLLKRYSEFIGKRLRHVKRFSEFLGKRSGDENNSEYLGKGDHITKRYWEFLGKRHSKGKRYSDFLMGKRYSDFLMGKRHHLYNKRQGEWLGK*	Obi-PXFVamide-1	PMFVGKREDPMFIGKREDPMFVGRREDPMFIGKRQKDPVFVGKRFIDTMLSGGKREHVIELFSKGGFSGTRFVKRLSQYINGKSKYNPDLLSKRKSNLSLNGDFQASNDKRELESLTMNKPILRSKEDGSSADEISISRPNIFSGIKRYSGPSFVSKTIKYPLVNSAKNRYTMLSGKRDDDPLFVGKRIVGRNYLIANRKFSAKRRQKFKRTAAKPSNTISLNKQDFSHTMLVKRYLGIQDPSSLVIELPNIHNPSNSVMPSKILSKKGLHMPLNVLYALPMKSDSFDNFKDTNRTVYGEKTSLGSSKTDLTSKVISRRSLSQPSSHNFKEGKINAVRVNNGKIEKPYEKHADMLSHSGDAIENSQRLMSSTAKEDNHGDKTDLRDVEIPVR*
PXFVamide-2	-	-	-	-	Aca-PXFVamide-2	-	Lgi-PXFVamide-2	-	Ctr-PXFVamide-2	GVLAQNTGTHANGGSDSDDGKVRVMSSTLTSPSVSSSSSSSAAVSVPAAKSVTLDKLPVQNNFVSSGASTHFLPVFASHAHKLPLRAIFSNSPNHVPKNTHLPLSSTFFSDEGQDEIDLSPEKLEENSHGHHQQQNHRVKRGGYNAPYFVGKRSLEESEDLEQEELQKRGLPNEDMVNNLPELQLQPDSVELEEEDPSVLMDKRRAPMFFGKRRAPFFVGKRRAPFFVGKRSYIPAFGEQNPILFATRAAPMFVGRRQAKAPMFIGRRAAAPMFVGKRAAAPMFVGKRAADDLNELLAALHTLQAARHYRRMIQADK	Bgl-PXFVamide-2	-	-	-	Sgl-PXFVamide-2	-	Obi-PXFVamide-2	MRIYLSVYIVVILSASVWGQVKNGHLIDYNAADSESVKNAVKDTVMKPLVGSSYLNIPSGHTQDNGEVALPDXSVMNDPFIAYTDDEDEGLEKRPMEFLGKRPMEFLGKRPMEFLGKRPMEFLGKRPMEFLGKRPMEFLGKRPMEFLGKRPMEFLGKRADDLDDKRRMEFLGKRRMEFLGKRRMEFLGKRPMEFLGKRTQQFHCFENPIDLS
sCAP/Pyrokinin-1	Hla-sCAP/Pyrokinin-1	MPRKRLQSEGRSGYLAFPRMGRSGQQTAGSDECCTMGLKNEWVVGDEGKAEVRSICQTGNVCCSGLKETVDTKPDGVIYSMCLPECYKPQTVNKSVLGKLKRLLQQ*	sCAP/Pyrokinin-1	MEMSLQRVSISMSLLVILVCSAEAMNYLAFPRMGRSGYLAFPRMGRSQAKSETAAEFGNCCGVGLKSELVIGHDGKEELRPVCTVNAECCQGLRELADQKPDGTYYSMCVPDLPFSLESNGPSSEVLKKLKTLMKK	Aca-sCAP/Pyrokinin-1	MMDLQGENYLAFPRMGRARPGYLAFPRMGRSQMKTETGTDCCGLGMKSEFVIGQEGKEELRHGACSSSVACCAGLREIVDQKQDGVFFSMCVPDFVASRSSEESSSEVLSKLKSLLQK	Lgi-sCAP/Pyrokinin-1	MEPSPVKIVACFVIFAVIGTEAMNYMAFPRLGRSGYLAFPRLGRSDGQTIQSSEFEQAECCPEGIKSHWIIIGASKPEIRSRCSPKSVCCEGLEELVGRSSDHIFYTKCTKITDEKTENTVLDRLLRKS	Ctr-sCAP/Pyrokinin-1	MKTATGRMVLALLFTMATVTQAMNYLALPRMGRSAYIAFPRLGRGYLAFPRLGRSQGGSDANKDGTDCCMTGLNKEWMPQEGGTTTTRNICPAESCCQGLREILAQKPDGVFYSMCIPACASEGDSKATETSRNVLRKLKDILQN*	Bgl-sCAP/Pyrokinin-1	MELTLLQATVTLAVLVLVGGEKQTQKPYIAFPRMGRSGYLAFPRMGRSQLKPETFFDNGACCGVGVKAEYFVSQDGKEVIRSSCAPHLVCCEGLREINDEKTDGVYFSLCIPDTPLAEESGVRSSEILSSLKRLLEK	Cgi-sCAP/Pyrokinin-1	MIVSGITSFMLLFVLLLQTDAKPTSALRQKRAPKYFYFPRMGRSAFYFPRMGRNQESADQEQSEEDIPCCNVGVSRAWGPEDPEPRRICPAAKCCGHLSSKVYVDSDLTVYEICVSDVAALPMEQKS	Sgl-sCAP/Pyrokinin-1	MLVTRITSFMLLFALLSNTEAKPTSTLRQKRAPKYFYFPRMGRSAFYFPRMGRNNGPQPNPYKHYPLLSSNEQLGNQDLESIDMPETNEHSFGQPAPYKQNLPVSKSQILPSQGDDSMPGDICCSAGVSRVWGLKDLKPRHLCSAKKCCIGLTSKVYVASDLTVYELCVSDTAEQPLETKS	Obi-sCAP/Pyrokinin-1	MFCKHLSFVAITICFLLVLAKTENEIQQKNINFDQRTWRNMRSNGYLALPRQGRSDNQPDYTCCGMPLTKYVGICPIGMECCPGLKKVLQKSGQRTIYSVCVADAY
sCAP/Pyrokinin-2	-	-	sCAP/Pyrokinin-2	MEVSVSRTSLFAAVLILMVCGAEAMNYLAFPRMGRSGYLAFPRMGRSQGQSAAVEGVASCCGLGLKSEFVIGQNGKEELDVVCAAPAGCCEGLREIVEQSSTGTSYSLCVPDSLFHQDTKESKAETLRKFKVLTRM	Aca-sCAP/Pyrokinin-2	-	Lgi-sCAP/Pyrokinin-2	-	Ctr-sCAP/Pyrokinin-2	MDASACRMLLALLFVTATVTEAMNYLALPRMGRSGYIAFPRLGRGYLAFPRMGRSQGASVDAERGASCCALGLKTEWLLAEDGKTTTQNICEAKSCCQGLQEVMDQKPDGAFYTLCIPTCSSEETKPEAANENMLLKLKGLLRN*	Bgl-sCAP/Pyrokinin-2		-	-	-	-	Obi-sCAP/Pyrokinin-2	MFCKHLSFVAITICFLLVLAKTSNGYLALPRQGRSDNQPDYTCCGMPLTKYVGICPIGMECCPGLKKVLQKSGQRTIYSVCVADAY
Schistosomin-like	Hla-Schistosomin-like	MKVLVLLVLVGFAAYQVTEARMNAFSCSSDCFSYLEGPYCISNGSVVCDNCGYLFVLKRLHKSMRLDRKTETAYQVTEARQNAFSCSEDCFSYLEXPYCISNGSVICDNCVRDKMLCQDLSLTSKDCNSACD*	-	-	Aca-Schistosomin-like	MMRQLFVLVIVAGAVLADNYWCPKAGEAFECFESSPTERFCLTNGRETAVICSKCRKKFDFCRNDFVKSKRAHTDCGAGWESTPCTHDNSHVPAVFPGKL	Lgi-Schistosomin-like	-	Ctr-Schistosomin-like	-	Bgl-Schistosomin-like	MKTVFFILALIVCAVVADNYRCPNPGDAFECFESDATARFCVSGKRGAYVICSKCRRKYEFCANGAKVSKRPEVECRADWASTECTSDNSDVPSVM*	-	-	-	-	-	-
Tachykinin	-	-	Tachykinin	MTPLIPTLALTFVLVAICHARAASFESGNFIQTSGLHRNAGDYIENQETDASFRDALADHQQVRRNGQSLGLSENWLSLTSHLAEPAGGRYVPTGFNGSRGKRLIPGLEPLLLARYYQDAEKWKRQPHQGFHGSRG	Aca-Tachykinin	-	Lgi-Tachykinin	MNQDCGFYILLVSVFVLFSLQIVLADDTELYKNNEEKRFAAFNDFSNPETPYSKQYWFYPHTSQGFLKTLLRYLALNEQSYRNTVKRQRTFGFVGTRGKRGDTFDGLKDFVRKLQDEINRRKYGSMLLDNSLDNSQNGYNKLELKLDQ	Ctr-Tachykinin	-	Bgl-Tachykinin		Cgi-Tachykinin	MVYLQRALFSLVFLITYSVTSATTGQLWDSVESDLDDTIESGDPVHKPLINFLINPKDLHKAGIPESSSEEKRFGFAPMRGKRFNNDVEFPLVRNNKRARFFGLRGKRVPSLVQRLSDEDFKNILGKLLNDACDFSTNSNDADSSLEKRFRFTALRG	Sgl-Tachykinin	MVNLQRALFSLLFLISCSVTSAAPDPLWNSAAESTDLEDSGDSVERIDKPLIDFLITRNDFERAGIPASSAEKRYGFAAMRGKKLYNDLESPTVRNSKRARFFGLRGKRVPNLRHKLSDEEFKNILGKLLTDAYDFSTNSNDADSSPEKRFRFTALRG	-	-
Wwamide-1	Hla-Wwamide-1	MDLKSFFCLILPTLATLQLSLAEDPSLVEGVKPVSEAGQRSLQDSDSAADKRQWSNFHSWGKRWGNFGTWGKKWASSDFPAWGKRWAGSSFTSWGKRNASPEEQKRNWNQFITWGKRNWHALTSWGKRSQDKTEKKWNTLPTWGKRAGWDNGFASWGKRDEVDVRDQLIKLFDESGK*	Wwamide-1	MSVWGKRDDAMDKRWRDMAVWGKRDQEVPNVKWNIVPWGEHSFSPDLNKKWKEMSVWGKRDNSELEKKWKEMAVWGKRNDELDKKWKEMSVWGKRDGDLEKKWKEMSVWGKRDGDLDKKWKEMAVWGKRYMFPDLDKKWREVAIWGKRNAELLGDSNNNVDTSGVWGKRNLRHIRNWRDMDMWGKRPSWSKTGFTSWGKRSPDIDLNLLKDYLQRTKPLLDSAPEAQGENSSVLQAAQTTQTLT	Aca-Wwamide-1	MTLHLASPFILLFTIAYSLTSAVQGLEPLPAASLSDSPASGADVPPLPSSAATNAAVDKEWLRQKLEEGQ FLPQQDKRWGGINSWMTHRLGGPSERDSSQDSLDKQLLVNNVQNYDDSSKRKWSKFSSWGKRDASEETPE GGEGEDGLGAVKKWKNMAVWGKRAEDGLDKRWKQMATWGKREDGDVLGLGTDKRWKQMASWGKRLDDSDR DKKWKQMSVWGKREDNGEPLDKKWKEMSVWGKRDTLDDPEKRWKQMAVWGKRQGLDDRNDKRWKQMATWG KRNSSENYDKRWKQMSVWGKRDGDGDLDKRWKQMSVWGKRDGDGDLDKRWKQMSVWGKRNGDGDLDKRWK QMSVWGKRDGDEDVEKRWKQMSVWGKRDGDADLDKRWKQMSVWG…	Lgi-Wwamide-1	MDLKTILCLIIYSLLLQISHAEEQLANDIELSNSLNPVDKRAWKSSYLNTWGKRWNPRYNLRGYQRMPIWAKRWTNSGLITWGKRSADTEIPIHKRKWNQFITWGKRSGVPSIVKRSVGDELVPWGKNKDTLPELNTSSDNLDNKLIDLETTPSTDKLSLDEKRASDKGWNGFTTWGKRANKDWSSLSTWGKRGQNKDWSSLTTWGKRGHDRDWNSLTTWGKRANKDWSSLSTWGKRARENDWSALSTWGKRANNKDWASLTTWGKRANDRDWNSLTTWGKRAKGNNWSGLTTWGKRANKDWNSLTTWGKRANKDWNSLTTWGKRGNKDWSGLTTWGKRGNKDWSGLTTWGKRGNKDWSGLTTWGKRGNKDWSGLTTWGKRGNKDWSGLTTWGKRGNKD…	Ctr-Wwamide-1	MEVRHFLYLLISAMAAMYHLTFVEASEESALDEETDTSSSSQDSQNLLENMLEKRWPQFRSWGKKWDWKRWQALNTWGKRWNNKFATWGKRGWSQKPFVTWGKRDWSDQSFVPWGKRGWNDQSFATWGKRGWNDKSFATWGKRGWNDKSFATWGKRGWSDRSFAPWGKRGWDDQSFATWGKRGWGDQSFAPWGKRGWDDQSFATWGKRGWNDKSFATWGKRDWNDNSFAPWGKRGWNDQSFATWGKRPAGDTSLQTLWIKRPSSWNQLGVWGKRGWGNHQFATWGKRDSDEDTLTTPEVEQEEETLSAETPEKRTWNQFVTWGKRDGLHHLHKRWANVQTWGKRTSEEEGNEEDTPSETHATNTQATTSTDSSKTDDSEAEETASEHSEENSDSKDNAS…	Bgl-Wwamide-1	MTLALTLCHVILICLLQDTALADRTLQLNEAVEDPSSTSASAENVGDQPSEKRHWSQFRSWGKRSLDDDALSKRWKEMSVWGKREADLLSNHQDMDYLYPAIVWEGSQMSGANPELDKKWKEMSVWGKRNVDPELEKRWKQMAVWGKRSSDPELEKKWKEMAVWGKRDFDPELEKKWKEMAVWGKRDNDPELEKKWKEMAVWGKRDFYPELDKKWKEMSVWGKRDFDPELEKKWKEMSVWGKRDFDPELEKKWKEMSVWGKRDFNPELEKKWKEMSVWGKRDFNPELEKKWKEMSVWGKRDFDPELEKKWKQMSVWGKRGVDNNGKQTIRHTRKWRWANLGAKRPSWSSTGFSSWGKRSEDLDLHDVKEYLQKTLPVSELEETPQEAGELKSQDQGTPL…	Cgi-Wwamide-1	MLCHLEQLLLSCIVLCLVKVCASLKAQDEASVNDHDIVRRQAMGHSFGDELEGFDLDPKRVNNWNQFPAWGKRLSKRRWSSLGAWGKRSWLDRLISANNNWGKRWKSMSNSWGKRQAPSEFDGLSDDYINIKKRSVDSKFSHNSRNKRSIPTELSPEQNEEKRRWSSLSAWGKRSDDDEKRRWSSLSAWGKRSNPEAIDDNDSDNISKRKWSSFSSWGKRGDPVDLSKRLYSYWQNRLMTNNPWMERRGWNAFSSWGKRSMD	Sgl-Wwamide-1	MHCDLHQLYLSCVILSLVKVCSSLRTKQIETSVTGRDIVKRHAGVSNGYGEELDGYDLDPKRDNYNWDQFPAWGKRQAKRRWSSFGTWGKRGWLDRLISANNNWGKRWKSMSNSWGKRQAPMEYDGLNDEYVNVEKRSVNSKSRNKRSISSDPTSDKTEEKRRWSSLAPWGKRSDDAEKRRWSSLSAWGKRSEPESLNSQDSEEDFTKRKWSSLSAWGKRNNPENLLNSDEITKRKWSSFTSWGKRGLPSDISKRLTTYWRQRLLQDSGPWMERRGWNALTSWGK*	Obi-Wwamide-1	MATFLNFLLLVTVLALTKFSTLSAELNELSNKQSAIKVARSMLPAKFLESDPEAWDEKIGDQRNWEDRLSMKRNWDELSSWGKRSAFDNSAIDNEFGNSLRRALNSHNLKLSSLLDGAELKKRWDSLQAWGKRNANGNEAAYGKNVKRDHMVKLSDGTWKKISSADGDKRGNGWDEMSGWGKRSAVQHKIRSRNWDSLQAWGKRESPSDDSALYENNQLQKRSTGKIL*
Wwamide-2	-	-	Wwamide-2	MDIRTLATLSITILQVSLVTLAKDLSVDAQILHPQQLHFPQQISNNPAAETVSIDVPVSSSYDIDQDKSILPFDSKELKNDELHNSHEQFELFNKNNWDPLSHTGQTTWPEMSALNHNTAEVEGLNAQDPNDEYLDKRKWSSFTSWGKRDNGNVPGGDAEKRWKEMSVWGKRDDAMDKKWKEMSVWGKRGDAMDKKWKEMSVWGKRGDAMDKKWKEMSVWGKRGDAMDK	Aca-Wwamide-2	-	Lgi-Wwamide-2	-	Ctr-Wwamide-2	-	Bgl-Wwamide-2	-	-	-	-	-	Obi-Wwamide-2	MATFLNFLLLVTVLALTKFSTLSAELNELSNKQSAIKVARSMMPAKFLESDPEAWDEKIGDQRDWEDRLSMKRNWDELSSWGKRSAFDNNAIDNEFGNSLRRALNSHNLKLSSLLDSAELKKRWDSLQAWGKRNANGNEATYGKNVKRDHMVKLSDGTWKKITSADGDKRGNGWDEMSGWGKRSAVQHKIRSRNWDSLQAWGKRESPSDDTALYENNQLQKRSTGKIL*
